# Supplementary material for: Oral phenotype and scoring of vascular Ehlers–Danlos syndrome: a case–control study
Source: PubMed Central journal article supplement — BMJ Open. 2012 Apr 5;2(2):e000705. doi: 10.1136/bmjopen-2011-000705 (PMC3323826; doi:10.1136/bmjopen-2011-000705), 2012-04-05

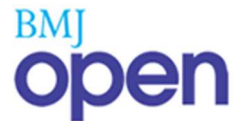

## Oral phenotype and scoring of vascular Ehlers-Danlos Syndrome: a case control study

|                                 |                                                                                                                                                                                                                                                                                                                                                                                                                                                                                                                                                                                                                                                                                                                                                                                                                                                                                                                                                                                                                                                                                                                                                                                                    |
|---------------------------------|----------------------------------------------------------------------------------------------------------------------------------------------------------------------------------------------------------------------------------------------------------------------------------------------------------------------------------------------------------------------------------------------------------------------------------------------------------------------------------------------------------------------------------------------------------------------------------------------------------------------------------------------------------------------------------------------------------------------------------------------------------------------------------------------------------------------------------------------------------------------------------------------------------------------------------------------------------------------------------------------------------------------------------------------------------------------------------------------------------------------------------------------------------------------------------------------------|
| Journal:                        | <i>BMJ Open</i>                                                                                                                                                                                                                                                                                                                                                                                                                                                                                                                                                                                                                                                                                                                                                                                                                                                                                                                                                                                                                                                                                                                                                                                    |
| Manuscript ID:                  | bmjopen-2011-000705                                                                                                                                                                                                                                                                                                                                                                                                                                                                                                                                                                                                                                                                                                                                                                                                                                                                                                                                                                                                                                                                                                                                                                                |
| Article Type:                   | Research                                                                                                                                                                                                                                                                                                                                                                                                                                                                                                                                                                                                                                                                                                                                                                                                                                                                                                                                                                                                                                                                                                                                                                                           |
| Date Submitted by the Author:   | 29-Nov-2011                                                                                                                                                                                                                                                                                                                                                                                                                                                                                                                                                                                                                                                                                                                                                                                                                                                                                                                                                                                                                                                                                                                                                                                        |
| Complete List of Authors:       | Ferré, François; Assistance publique-hôpitaux de Paris (AP-HP), Dental department, Hopital H.Mondor-A.Chenevier<br>Frank, Michael; Centre de Référence des Maladies Vasculaires Rares Gogly, Bruno; Assistance publique-hôpitaux de Paris (AP-HP), Dental department, Hopital H.Mondor-A.Chenevier<br>Golmard, Lisa; Centre de Référence des Maladies Vasculaires Rares Naveau, Adrien; Assistance publique-hôpitaux de Paris (AP-HP), Dental department, Hopital H.Mondor-A.Chenevier<br>Chérifi, Hafida; Assistance publique-hôpitaux de Paris (AP-HP), Dental department, Hopital H.Mondor-A.Chenevier<br>Emmerich, Joseph; Centre de Référence des Maladies Vasculaires Rares Gaultier, Frédéric; Assistance publique-hôpitaux de Paris (AP-HP), Dental department, Hopital H.Mondor-A.Chenevier<br>Berdal, Ariane; : Université Paris Descartes, Sorbonne Paris Cité, UMR S872, 75006 France Centre de Recherche des Cordeliers, Université Pierre et Marie Curie, UMR S872 INSERM U872, team 5<br>Jeunemaître, Xavier; Centre de Référence des Maladies Vasculaires Rares Fournier, Benjamin; Assistance publique-hôpitaux de Paris (AP-HP), Dental department, Hopital H.Mondor-A.Chenevier |
| <b>Primary Subject Heading</b>: | Dentistry and oral medicine                                                                                                                                                                                                                                                                                                                                                                                                                                                                                                                                                                                                                                                                                                                                                                                                                                                                                                                                                                                                                                                                                                                                                                        |
| Secondary Subject Heading:      | Genetics and genomics, Diagnostics                                                                                                                                                                                                                                                                                                                                                                                                                                                                                                                                                                                                                                                                                                                                                                                                                                                                                                                                                                                                                                                                                                                                                                 |
| Keywords:                       | ORAL MEDICINE, VASCULAR MEDICINE, MOLECULAR BIOLOGY                                                                                                                                                                                                                                                                                                                                                                                                                                                                                                                                                                                                                                                                                                                                                                                                                                                                                                                                                                                                                                                                                                                                                |
|                                 |                                                                                                                                                                                                                                                                                                                                                                                                                                                                                                                                                                                                                                                                                                                                                                                                                                                                                                                                                                                                                                                                                                                                                                                                    |

SCHOLARONE™  
Manuscripts

1  
2  
3 Oral phenotype and scoring of vascular Ehlers-Danlos Syndrome: a  
4  
5  
6 case control study  
7  
8  
9

10  
11 FERRE FC <sup>1,3</sup>, FRANK M <sup>2</sup>, GOGLY B <sup>1,3</sup>, GOLMARD L <sup>2</sup>, NAVEAU A <sup>1,3</sup>, CHERIFI H <sup>1,3</sup>,  
12  
13 EMMERICH J <sup>2,4</sup>, GAUTIER F <sup>1</sup>, BERDAL A <sup>3</sup>, JEUNEMAITRE X <sup>2,5</sup>, FOURNIER BPJ <sup>1,3</sup>  
14  
15

16  
17  
18 1 : A.Chenevier- H.Mondor hospital, Dental department, Créteil, France  
19 2 : Centre de Référence des Maladies Vasculaires Rares, HEGP, Paris, France  
20 3 : Université Paris Descartes, Sorbonne Paris Cité, UMR S872, 75006 France  
21 Centre de Recherche des Cordeliers, Université Pierre et Marie Curie, UMR S872  
22 INSERM U872, Paris, France  
23 4 : INSERM U765, Paris, France  
24 5 : INSERM U970, P.A.R.C.C.,Paris, France  
25  
26  
27

28  
29 **Corresponding author:** Dr Ferré François, DDS  
30 A.Chenevier/H.Mondor hospital, Dental department  
31 40 rue Mesly, 94 000 Créteil, France  
32 Mail to: ferrefrancois@hotmail.com  
33  
34  
35  
36  
37  
38  
39  
40  
41  
42  
43  
44  
45  
46  
47  
48  
49  
50  
51  
52  
53  
54  
55  
56  
57  
58  
59  
60

## Summary

### Article Focus

- We aimed to assess oral features of vEDS.
- Gingival recession is the only oral sign recognized as a minor diagnostic criterion in the Villefranche classification, but it lacks literature support.

### Key Messages

- Prevalence of gingival recession and periodontitis was low among patients with vEDS.
- Conversely, patients showed marked gingival fragility, temporo-mandibular joint disorders, dentin formation defects, molar root fusion and increased root length.
- Several new specific oral signs of this disease were identified, whose combination may be of greater value in diagnosing vascular Ehlers-Danlos syndrome.

### Strengths and Limitations

- All screened patients had genetically confirmed vascular Ehlers-Danlos syndrome.
- More studies with larger sample size are needed to confirm the oral score, but this could be difficult since vEDS is a very rare disease.

**ABSTRACT**

**Objective:** Vascular Ehlers-Danlos syndrome (vEDS) is a rare genetic condition related to mutations in the *COL3A1* gene, responsible of vascular, digestive and uterine accidents. Difficulty of clinical diagnosis has led to the design of diagnostic criteria, summarized in the Villefranche classification. Our goal was to assess oral features of vEDS. Gingival recession is the only oral sign recognized as a minor diagnostic criterion. We aimed to check this assumption, since bibliographical search related to gingival recession in vEDS proved scarce.

**Design:** prospective case-control study

**Setting:** Dental surgery department in a French tertiary hospital.

**Participants:** 17 consecutive patients with genetically proven vascular Ehlers-Danlos syndrome, aged 19 to 55 years were compared to 46 age and sex-matched controls.

**Observations:** Complete oral examination (clinical and radiological) with standardized assessment of periodontal structure, temporo-mandibular joint function and dental characteristics were performed. *COL3A1* mutations were identified by direct sequencing of genomic or complementary DNA.

**Results:** Prevalence of gingival recession was low among patients with vEDS, as for periodontitis. Conversely, patients showing marked gingival fragility, temporo-mandibular disorders, dentin formation defects, molar root fusion and increased root length. After logistic regression, 3 variables remained significantly associated to vEDS. These variables were integrated in a diagnostic oral score with 87.5% and 97% sensitivity and specificity respectively.

**Conclusion:** Gingival recession is an inappropriate diagnostic criterion for vEDS. Several new specific oral signs of the disease were identified, whose combination may be of greater value in diagnosing vascular Ehlers-Danlos syndrome.



1  
2  
3 **Key words (MeSH):** Ehlers-Danlos syndrome, vascular type; Oral, Diagnostic Tests, General  
4  
5 practice.  
6  
7  
8  
9  
10  
11  
12  
13  
14  
15  
16  
17  
18  
19  
20  
21  
22  
23  
24  
25  
26  
27  
28  
29  
30  
31  
32  
33  
34  
35  
36  
37  
38  
39  
40  
41  
42  
43  
44  
45  
46  
47  
48  
49  
50  
51  
52  
53  
54  
55  
56  
57  
58  
59  
60

For peer review only

## INTRODUCTION

Vascular Ehlers-Danlos syndrome (vEDS OMIM # 130050) is a rare genetic condition with an estimated prevalence of 1/150,000 [1]. Its clinical course is the most severe amongst the Ehlers-Danlos syndromes. The inheritance of vEDS follows an autosomal dominant trait, and is related to mutations in the *COL3A1* gene, encoding the pro- $\alpha$  (1) chain of type III procollagen [1]. The mutation typically alters the assembly, stability and thus secretion and resistance to tensile stress of this fibrillar collagen, resulting in early spontaneous arterial, digestive and obstetrical accidents. Over 250 different mutations have been described in the *COL3A1* gene, typically either missense mutations affecting a glycine residue, splicing mutations or rare exonic deletions [2]. No genotype-phenotype correlations have been evidenced, except for haploinsufficiency, which may be characterized by a consistently milder phenotype [3].

Oral involvement is frequently present in patients with vEDS, even in the early adulthood, described as gingival recession [4]. This oral sign of the disease, despite being part of the minor diagnostic criteria of the Villefranche classification [4] remains poorly documented and no in-depth description of the proposed occurrence of gingival recession in the vEDS diagnostic criteria was found in previously published reports.

In this study, we aimed to reassess oral involvement in a cohort of patients with molecularly proven vEDS (i.e. with sequenced *COL3A1* mutations). We hypothesised that a systematic assessment of dental, gingival and osteo-articular characteristics of these patients would show significant differences with age- and sex-matched controls.

## METHODS

### Study design

This study was designed according to guidelines of the STROBE statement. Consecutive patients with molecularly proven vEDS and healthy volunteers were prospectively included in a monocentric case-control study. Each patient was appointed for a routine dental visit. Detailed standardized clinical records on teeth and surrounding soft tissues were made by a senior dental surgeon. Most of the time, physicians were aware of the patient's diagnostic status upon inclusion except for patients that were in diagnostic work-up with genetic testing in progress. Standardized dental X-rays were performed for each subject which included periapical X-rays of the upper and lower jaws for detection of root and surrounding bone structure, positional assessment of emerged and emerging teeth, and temporomandibular joint imaging by orthopantomogram (OPG). Intra-oral pictures were made for all patients. All examinations were performed for clinical care and diagnostic purpose.

### Study population

Patients with genetically diagnosed vEDS from the Centre de Référence des Maladies Vasculaires Rares (Hôpital Européen Georges Pompidou, Assistance Publique des Hôpitaux de Paris, Paris, France), the French national referral centre for patients with vEDS, were sent to the Dental Department of Albert Chenevier Henri-Mondor university hospital for dental care. Patients with suspected vEDS referred for dental status assessment without mutation in the *COL3A1* gene were excluded of the study after screening. The control group was constituted by random inclusion of consecutive healthy subjects that consulted the dental department for clinical care. Control subjects had no medical history, especially no suspicion of connective tissue disorder, and were referred for general dentistry purposes. Patients of the

1  
2  
3 control group were age- and sex-matched with the vEDS patients in a ratio close to 3 to 1. To  
4  
5 limit the possibility of confounders of gingival bleeding or temporo-mandibular disorders, 3  
6  
7 common oral indexes were measured at baseline: plaque index, gingival index, and  
8  
9 decayed/missing/filled teeth (DMF-T) index.  
10

### 11 12 13 **Medical and Genetical data.**

14  
15  
16 Patients included in this study were clinically assessed by senior physicians of the  
17  
18 French referral centre for rare vascular diseases (see above). Patient history and clinical  
19  
20 characteristics of vEDS were systematically assessed by a standardized observation. Number  
21  
22 and type of vascular, digestive and uterine complications were recorded. Major and minor  
23  
24 clinical diagnostic criteria were staged according to the Villefranche classification [4].  
25  
26 Genomic DNA was obtained by saline extraction from whole blood leucocytes. The *COL3A1*  
27  
28 gene was then analyzed by direct sequencing as previously described [2]. In case of negative  
29  
30 direct DNA sequencing, patients were screened for exon skipping by fibroblast culture, RNA  
31  
32 extraction, reverse transcription and polymerase chain reaction (RT-PCR), and direct  
33  
34 sequencing [2]. All patients gave written informed consent. Mutations are described according  
35  
36 to the nomenclature recommended by the Human Genome Variation Society. DNA mutation  
37  
38 numbering was based on *COL3A1* human cDNA sequence (GenBank NM\_000090.3).  
39  
40  
41  
42  
43  
44  
45  
46  
47  
48  
49  
50  
51  
52  
53  
54  
55  
56  
57  
58  
59  
60

## Oral examination

**Periodontal status.** The periodontal data consisted in standardized measurement of gingival fragility, thickness, recession and surface texture. Fragility and bleeding tendency was assessed by a periodontal probe and staged according to Loe and Silness [5]. History of and ongoing gingival bleeding and its frequency during tooth brushing as described by patients was recorded. Gingival thickness was measured by the ability to see the graded periodontal probe through gingival tissue [6]. Recessions of the gingival margin in respect of the cemento-enamel junction were measured at six different sites per tooth. The gum surface texture (stippling) was assessed visually and evaluated qualitatively. Diagnosis of periodontitis was checked clinically and radiologically. Periodontal pockets were evaluated by probing and alveolar bone level was assessed by X-rays in order to detect horizontal and angular bone loss.

**Dental status.** Teeth were clinically and radiologically assessed for structural abnormalities and secondary lesions (decay, traumatic injury...), as well as root fusion and pulp volume, defined by the pulp to crown area ratio as measured on retro-alveolar X-Rays. Root length of mandibular teeth was defined as normal when stopping before the upper limit of the mandibular canal which is easily visible on the OPG, and as long when crossing it.

**Temporo-mandibular joint (TMJ) status.** History of oro-facial pain originating either from the masticatory muscles or the joint capsula was recorded, including reports of pain in the jaw, temples, face, pre-auricular area or the TMJ both at rest and in function. Physical examination included the observation and measurements of mandibular motion (maximal interincisal opening, lateral movements and protrusion), palpation of the masticatory muscles (masseter, temporalis, medial and lateral pterygoid muscles), and static and dynamic TMJ palpation. During mandibular motions, noises were staged as follows:

1  
2  
3 “clicking”, “popping” as a consequence of disk displacement, and “crunching”, “grating”  
4  
5 and/or “grinding” as a consequence of osteoarthritis. Joint surfaces were studied on OPGs, in  
6  
7 search of extensive flattening or sclerosis of the articular surfaces. TMJ disorders were then  
8  
9 staged according to validated international guidelines (Research Diagnostic Criteria for  
10  
11 Temporo-Mandibular Disorders, RDC/TMD) as previously described by Dworkin et al. [7].  
12  
13 Briefly, three groups are individualized by this classification: muscle disorders (group 1), disk  
14  
15 displacements (group 2) and arthralgia/arthritis/arthrosis (group 3). These clinical indicators  
16  
17 allow a stratification of TMD for each subject, for each group may be present separately or in  
18  
19 association with one other.  
20  
21  
22  
23  
24

### 25 **Statistical analysis**

26  
27 Descriptive statistics used numbers and percentages for qualitative variables and  
28  
29 median and inter-quartiles ranges intervals for quantitative ones. The comparison between  
30  
31 groups was performed using chi-square tests or Fisher’s exact tests for qualitative variables  
32  
33 and two-sample Wilcoxon tests for quantitative ones. Variables with a p-value < 0.10 in the  
34  
35 first step were then entered in a step-wise logistic regression. Variables with a p-value < 0.06  
36  
37 using the Wald test were retained in the final model. A simplified diagnostic score with 5  
38  
39 levels was built from the results of the logistic model. The ROC curve of this simplified  
40  
41 diagnostic score was computed, a threshold was determined, and sensitivity and specificity  
42  
43 were evaluated using this threshold, with their exact 95 % confidence intervals. All the tests  
44  
45 were two-sided, with a p-value considered significant when < 0.05. All the computations were  
46  
47 performed using the SAS® V9.2 statistical package (SAS Institute Inc., Cary, NC, USA.)  
48  
49  
50  
51  
52  
53  
54  
55  
56  
57  
58  
59  
60

## RESULTS

### Participants

Between November 2009 and June 2011, 27 consecutive patients with suspected or confirmed vEDS were referred for dental examination. Patients without genetic confirmation of vEDS (n=6) were not considered eligible for participation. Of the 21 remaining patients, four declined participation and 17 were finally included (Figure 1). In one patient, OPG was unavailable and therefore excluded from the design of the oral score. Control subjects (n=68) were screened for an inclusion ratio of 3 to 1. Five subjects declined participation and 17 were considered ineligible for medical reasons (i.e pregnancy, diabetes ...), or dental status (full edentulous or severe periodontitis), leaving 46 controls that completed the study. Baseline characteristics of vEDS patients and controls are shown in table 1. Dental status of vEDS and control patients were equivalent as shown by the DMF-T index. The plaque and gingival indexes, source of confounding bias in specificity of gingival bleeding did not differ significantly between both groups.

### Periodontal status

Gingival recession was less frequent in patients (n=7; 41.2%) than in controls (n= 31; 67.3%). Periodontitis was present in 4 (23.5%) vEDS patients only when compared to controls (n=21; 45%). Presentation of gingiva in vEDS patients was evocative of a particular periodontal phenotype rather than common dental or periodontal disease. This phenotype was characterised by a generalized thinness of both gingiva and oral mucosa, and translucency of the gingiva with apparent vasculature (Figure 2A, C). Overall, increased gingival thinness was present in 16 (94%) patients versus 20 (43.3%) controls. Gingival surface texture was also evocative, with a decreased stippling and a papyraceous aspect when pressuring the gum with the dental probe (Figure 2D). These characteristics were associated to an increase in gingival

1  
2  
3 fragility, as measured by bleeding on probing during gingival thinness assessment (Figure 2B,  
4  
5 F, Table 1).  
6  
7

### 8 9 **TMJ status**

10  
11 Temporo-mandibular joint disorders were present in 14 (82%) patients with vEDS  
12 and in 11 (24%) controls ( $p < 0.0001$ ) (Table 1). Almost half of patients (41%) described TMJ  
13 pain whereas noted in only 3 (6.5%) controls. Pain originated from the masticatory muscles or  
14 the temporo-mandibular joint itself (groups 1 and 3 in the TMD classification [7]), and were  
15 described as a discomfort during mastication or yawning. 71% of the vEDS patients presented  
16 significant intra-articular disc displacement with reduction associated to clicking (group 2).  
17 Premature remodelling of the TM articular surfaces (Figure 3B) was present in 7 out of 16  
18 (43.8%) patients, versus 2 (4.3%) in controls ( $p = 0.0086$ ). This last finding was highly  
19 prevalent in vEDS patients whereas it was uncommon in controls, as expected in the general  
20 population.  
21  
22  
23  
24  
25  
26  
27  
28  
29  
30  
31  
32  
33  
34  
35  
36  
37  
38

### 39 **Dental findings**

40  
41 Dental abnormalities observed in patients with vEDS were related to defects in dentin  
42 formation rather than to common dental pathology (Table 1). X-ray analysis revealed a  
43 significant reduction in pulp volume (Figure 3C) secondary to progressive pulp obliteration  
44 by dentin synthesis. Pulpal volume decreases physiologically with aging in the general  
45 population [8], yet it was repeatedly observed in young vEDS patients of this cohort.  
46 Furthermore, 75% of vEDS patients presented retraction of the dental pulp shape versus  
47 29.8% of controls (Table 1). Molar root fusion was also more frequently present, particularly  
48 in the mandibular second molar (50 %) (Figure 3D) when compared to controls (19.5%).  
49  
50  
51  
52  
53  
54  
55  
56  
57  
58  
59  
60



1  
2  
3 Mandibular dental roots had more frequently significantly increased length in patients,  
4  
5 whereas such an observation was only exceptional in controls (n=1/46). Increased root length  
6  
7 was most often found on the second mandibular molar (n=11/16), more rarely on mandibular  
8  
9 premolars or the first molar. This sign is very easily identifiable by any physician on the OPG  
10  
11 (Figure 3E).  
12

### 13 14 15 16 **Oral score**

17  
18 Three oral characteristics remained significantly associated to vEDS after logistic  
19  
20 regression: increased root length, modified dental pulp shape and arthralgia/arthrosis (TMJ  
21  
22 disorder group 3). These variables were staged into a diagnostic score according to results of  
23  
24 the logistic model (Table 2): increased root length was weighted 2, and the two remaining  
25  
26 variables were weighted 1. Signs were either present (scoring either 1 or 2), either not present  
27  
28 (scoring 0). The total score is the result of adding weighted values of present signs. A score of  
29  
30 0 or 1 was considered negative and a score of 2 to 4 was considered positive with a sensitivity  
31  
32 and specificity of 0.878 95%CI [0.604-0.978] and 0.978 95%CI [0.870-0.999%] respectively  
33  
34 (Table 2 and supplemental data 2).  
35  
36  
37  
38  
39  
40  
41  
42  
43  
44  
45  
46  
47  
48  
49  
50  
51  
52  
53  
54  
55  
56  
57  
58  
59  
60

## DISCUSSION

This case control study is the first specific report of oral involvement in patient with genetically confirmed patients with vascular Ehlers-Danlos syndrome. We evidenced that gingival recession may be an inappropriate diagnostic criterion of vEDS, whereas several other original findings may be of greater diagnostic value: increased dental root length, TMJ pain and premature arthrosis and a decreased pulp to crown area ratio. The first two criteria are easily identifiable by any physician on an OPG and on physical examination. The third requires either a short specific training on reading retro-alveolar X-rays, or a specific, but simple evaluation by a dental surgeon.

Oral mucosa and gingiva have to be considered as an aspect of the general phenotype of vEDS. Indeed, typical skin involvement is marked by increased thinness with consequent translucency [9] and by increased fragility, illustrated by the occurrence of extensive spontaneous haematomas and delayed papyraceous wound healing. A decreased intima-media thickness of elastic arteries in vEDS, may be another phenotypic expression [10]. Similarly to the skin, type III collagen is present in the gingival connective tissue near the basement membrane and blood vessels [9]. Consequently, the disturbance of type III collagen production/secretion by the gingival fibroblast population, besides the physical and thermal stress the gum is exposed to and which may alter type III collagen [13], may explain in part the increase of gingival thinness [11, 12], and thus its fragility and bleeding tendency. Possible involvement of type III collagen in platelet adhesion would be a further precipitating factor for bleeding [14].

Dental abnormalities, and particularly radicular abnormalities as increased root length that has been repeatedly evidenced in our patients may be specific of the disease, as this condition is exceptional in the general population and therefore its random finding would

1  
2  
3 have been unlikely in the vEDS group. Type III collagen is necessary to type I collagen  
4 fibrillogenesis [15]. Other collagen gene mutations are reported to be associated with oral and  
5 dental abnormalities: type I collagen chain gene mutations are associated with type I  
6 dentinogenesis imperfecta in the more general context of osteogenesis imperfecta [16]. In this  
7 case, the teeth are specifically amber and translucent. Radiographically, the teeth have short,  
8 constricted roots and dentine hypertrophy leading to pulpal obliteration [16]. These diverse  
9 structural defects highlight the key-role of fibrillar collagens in mineralized tissue formation.  
10 An abnormal type III collagen in dental and articular tissues may also explain the dental and  
11 TMJ abnormalities/disorders. Its presence within dentin remains controversial, yet it has been  
12 evidenced in the epithelio-mesenchymal interface during dentinogenesis [17]. Finally, type III  
13 collagen has been evidenced in the posterior region of disc attachments of the TMJ [18].

14  
15  
16  
17  
18  
19  
20  
21  
22  
23  
24  
25  
26  
27  
28  
29  
30  
31  
32  
33  
34  
35  
36  
37  
38  
39  
40  
41  
42  
43  
44  
45  
46  
47  
48  
49  
50  
51  
52  
53  
54  
55  
56  
57  
58  
59  
60

Previous studies have reported diverse oral signs in EDS patients but none were specific to vEDS and none was dedicated to a cohort of patients with molecularly confirmed vEDS [19]. The absence of genetic certainty is a major selection bias as the disease may be confused with other connective tissue diseases as non vascular Ehlers-Danlos syndromes or more recently evidenced Loeys-Dietz syndrome [9]. Periodontal or oral lesions were recorded in several studies on patients with various non vascular subtypes of Ehlers-Danlos syndrome patients, but no significant association between oral signs and EDS subtype could be evidenced [20-24]. The only study reporting oral signs as a possible diagnostic tool in Ehlers-Danlos syndromes was related to the classical (OMIM#130020) and hypermobile (OMIM#130000 and OMIM#130010) types [25]. It was suggested that absence of the inferior lingual and labial frenulas were specific and sensitive signs for these forms of EDS, yet these results have been subject to controversy [26]. In our population sample, frenulas were absent in approximately one third of patients.

1  
2  
3 This study has several limitations. Firstly, our analysis is based on a small number of  
4 patients. However, this limited population sample has to be considered in respect of the rarity  
5 of vEDS, as it is to our best knowledge the most important clinical study of oral signs linked  
6 to this disease. Secondly, the sex ratio is unbalanced which may induce selection bias, notably  
7 for gingival thinness that is more common in women in the general population [6]. However,  
8 there is no evidence that oral signs of vEDS identified by logistic regression may be  
9 influenced by sex ratio. Furthermore patients were assigned age and sex-matched controls that  
10 may further limit any residual bias. Finally, no children or teenagers were included into this  
11 study. It is therefore not known if these findings may apply to this specific age category,  
12 which is of importance as typically the late teenage years match with the onset of digestive  
13 and arterial accidents in vEDS.  
14  
15  
16  
17  
18  
19  
20  
21  
22  
23  
24  
25  
26

27 The oral score we were able to design may be of use in clinical diagnosis of vEDS,  
28 especially as the phenotype is usually discrete and as diagnosis may be difficult even for  
29 experienced physicians.  
30  
31  
32  
33

34 Given its high specificity and sensitivity if it were to be confirmed, its diagnostic value  
35 as a major diagnostic criterion as defined by the Villefranche classification should be  
36 evaluated. A positive oral score associated with one major vEDS sign may indicate genetic  
37 testing of the *COL3A1* gene with a good positive predictive value. Further larger studies are  
38 necessary to determine the exact diagnostic value of gingival thinness and bleeding tendency  
39 in vEDS, as these signs were present in most patients, yet not independent predictors in our  
40 analysis. Considering the small number of vEDS patients, associations between mutation type  
41 and oral score were not tested. But interestingly, the two patients with a negative oral score  
42 had the same mutation type: an arginine substitution for glycine. This observation needs  
43 further explorations.  
44  
45  
46  
47  
48  
49  
50  
51  
52  
53  
54  
55  
56  
57  
58  
59  
60

1  
2  
3 In conclusion, our findings suggest that gingival retraction, used in the Villefranche  
4 classification, may be an inappropriate diagnostic criterion for vascular Ehlers-Danlos  
5 syndrome, and that increased root length, modified dental pulp shape and premature wear of  
6  
7 TMJ are significantly associated to vEDS. These findings, if confirmed, may implement the  
8  
9 latter in a diagnostic oral score for vEDS.  
10  
11  
12

### 13 14 15 16 **Author's contribution**

17 F.F., F.M., G.B., B.F. conceived and planned the study. L.G., N.A., C.H., E.J., G.F., played an  
18 important role in interpreting the results. F.F., F.M., B.A., B.F. wrote the paper. F.F., F.M.,  
19 B.A., X.J. approved the final version.  
20  
21

### 22 23 **Funding statement**

24 This research received no specific grant from any funding agency in the public, commercial or  
25 not-for-profit sectors  
26

### 27 28 **Competing interest**

29 All authors declare to have no competing interest.  
30  
31  
32  
33  
34  
35  
36  
37  
38  
39  
40  
41  
42  
43  
44  
45  
46  
47  
48  
49  
50  
51  
52  
53  
54  
55  
56  
57  
58  
59  
60

## REFERENCES

1. Pepin, M., et al., *Clinical and genetic features of Ehlers-Danlos syndrome type IV, the vascular type*. N Engl J Med, 2000. **342**(10): p. 673-80.
2. Pepin, M.G. and P.H. Byers, *Ehlers-Danlos Syndrome Type IV*. 1993.
3. Leistriz, D.F., et al., *COL3A1 haploinsufficiency results in a variety of Ehlers-Danlos syndrome type IV with delayed onset of complications and longer life expectancy*. Genet Med.
4. Beighton, P., et al., *Ehlers-Danlos syndromes: revised nosology, Villefranche, 1997. Ehlers-Danlos National Foundation (USA) and Ehlers-Danlos Support Group (UK)*. Am J Med Genet, 1998. **77**(1): p. 31-7.
5. Loe, H., *The Gingival Index, the Plaque Index and the Retention Index Systems*. J Periodontol, 1967. **38**(6): p. Suppl:610-6.
6. De Rouck, T., et al., *The gingival biotype revisited: transparency of the periodontal probe through the gingival margin as a method to discriminate thin from thick gingiva*. J Clin Periodontol, 2009. **36**(5): p. 428-33.
7. Dworkin, S.F. and L. LeResche, *Research diagnostic criteria for temporomandibular disorders: review, criteria, examinations and specifications, critique*. J Craniomandib Disord, 1992. **6**(4): p. 301-55.
8. Morse, D.R., *Age-related changes of the dental pulp complex and their relationship to systemic aging*. Oral Surg Oral Med Oral Pathol, 1991. **72**(6): p. 721-45.
9. Germain, D.P., *Ehlers-Danlos syndrome type IV*. Orphanet J Rare Dis, 2007. **2**: p. 32.
10. Boutouyrie, P., et al., *Increased carotid wall stress in vascular Ehlers-Danlos syndrome*. Circulation, 2004. **109**(12): p. 1530-5.
11. Byers, P.H., et al., *Altered secretion of type III procollagen in a form of type IV Ehlers-Danlos syndrome. Biochemical studies in cultured fibroblasts*. Lab Invest, 1981. **44**(4): p. 336-41.
12. Smith, L.T., et al., *Mutations in the COL3A1 gene result in the Ehlers-Danlos syndrome type IV and alterations in the size and distribution of the major collagen fibrils of the dermis*. J Invest Dermatol, 1997. **108**(3): p. 241-7.
13. Anderson, D.W., et al., *A glycine (415)-to-serine substitution results in impaired secretion and decreased thermal stability of type III procollagen in a patient with Ehlers-Danlos syndrome type IV*. Hum Mutat, 1997. **9**(1): p. 62-3.
14. Massberg, S., et al., *A crucial role of glycoprotein VI for platelet recruitment to the injured arterial wall in vivo*. J Exp Med, 2003. **197**(1): p. 41-9.
15. Liu, X., et al., *Type III collagen is crucial for collagen I fibrillogenesis and for normal cardiovascular development*. Proc Natl Acad Sci U S A, 1997. **94**(5): p. 1852-6.
16. Barron, M.J., et al., *Hereditary dentine disorders: dentinogenesis imperfecta and dentine dysplasia*. Orphanet J Rare Dis, 2008. **3**: p. 31.
17. Bronckers, A.L., D.M. Lyaruu, and J.H. Woltgens, *Immunohistochemistry of extracellular matrix proteins during various stages of dentinogenesis*. Connect Tissue Res, 1989. **22**(1-4): p. 65-70.
18. Gage, J.P., et al., *Presence of type III collagen in disc attachments of human temporomandibular joints*. Arch Oral Biol, 1990. **35**(4): p. 283-8.
19. De Coster, P.J., L.C. Martens, and A. De Paepe, *Oral health in prevalent types of Ehlers-Danlos syndromes*. J Oral Pathol Med, 2005. **34**(5): p. 298-307.
20. Linch, D.C. and C.H. Acton, *Ehlers-Danlos syndrome presenting with juvenile destructive periodontitis*. Br Dent J, 1979. **147**(4): p. 95-6.
21. Ooshima, T., et al., *Oral manifestations of Ehlers-Danlos syndrome type VII: histological examination of a primary tooth*. Pediatr Dent, 1990. **12**(2): p. 102-6.

- 1  
2  
3  
4  
5  
6  
7  
8  
9  
10  
11  
12  
13  
14  
15  
16  
17  
18  
19  
20  
21  
22  
23  
24  
25  
26  
27  
28  
29  
30  
31  
32  
33  
34  
35  
36  
37  
38  
39  
40  
41  
42  
43  
44  
45  
46  
47  
48  
49  
50  
51  
52  
53  
54  
55  
56  
57  
58  
59  
60
22. Pope, F.M., et al., *Ehlers Danlos syndrome type I with novel dental features*. J Oral Pathol Med, 1992. **21**(9): p. 418-21.
  23. Karrer, S., M. Landthaler, and G. Schmalz, *Ehlers-Danlos type VIII. Review of the literature*. Clin Oral Investig, 2000. **4**(2): p. 66-9.
  24. Rahman, N., et al., *Ehlers-Danlos syndrome with severe early-onset periodontal disease (EDS-VIII) is a distinct, heterogeneous disorder with one predisposition gene at chromosome 12p13*. Am J Hum Genet, 2003. **73**(1): p. 198-204.
  25. De Felice, C., et al., *Absence of the inferior labial and lingual frenula in Ehlers-Danlos syndrome*. Lancet, 2001. **357**(9267): p. 1500-2.
  26. Shankar, S., E. Shirley, and N.P. Burrows, *Absence of inferior labial or lingual frenula is not a useful clinical marker for Ehlers-Danlos syndrome in the UK*. J Eur Acad Dermatol Venereol, 2006. **20**(10): p. 1383-4.
  27. Ong, K.T., et al., *Effect of celiprolol on prevention of cardiovascular events in vascular Ehlers-Danlos syndrome: a prospective randomised, open, blinded-endpoints trial*. Lancet. **376**(9751): p. 1476-84.
  28. *Public Health Weekly Reports for SEPTEMBER 23, 1938*. Public Health Rep, 1938. **53**(38): p. 1685-1732.

## FIGURES LEGENDS

### Figure 1. Flow chart

### Figure 2. Periodontal characteristics of vascular Ehlers-Danlos syndrome

Both gingival and oral mucosa appear increasingly thin (A). Oral mucosa showed signs of spontaneous intramucosal bleeding as a likely consequence of increased fragility. Periodontal probing provoked excessive gingival bleeding (B). Assessment of gingival thinness was made by measuring levels of translucency on a scaled probe (C). Papyraceous aspect of the gingival tissue under periodontal probe pressure and decreased stippling (D). Comparison of gingival thinness (E) and gingival bleeding on probing (F) in patients with vEDS and healthy controls.

### Figure 3. Oral radiographic characteristics of vascular Ehlers-Danlos syndrome

An orthopantomogram of a 30 year old patient shows original dental findings (A) as premature remodelling of temporo-mandibular joints (B), decreased pulp volume, a thistle-shaped pulp chamber (C), an increased length of mandibular molar roots (D), root fusion of the second mandibular molar (E).



**Table 1. Baseline characteristics of patients with vascular Ehlers-Danlos syndrome and age and sex-matched healthy controls.**

| Variable                           | vEDS patients<br>n (%) or median<br>[Q1;Q3] | Controls<br>n (%) or median<br>[Q1;Q3] | Univariate p       |
|------------------------------------|---------------------------------------------|----------------------------------------|--------------------|
| N                                  | 17                                          | 46                                     |                    |
| Age                                | 33 [24;44]                                  | 36 [25;45]                             | ns                 |
| Male                               | 5 (29)                                      | 13 (28)                                | ns                 |
| <b>Periodontal features</b>        |                                             |                                        |                    |
| Plaque Index                       | 30 [20;54]                                  | 20 [13;60]                             | ns                 |
| Gingival Index                     | 1 [0;1]                                     | 1 [0;1]                                | ns                 |
| Probing Bleeding Index             | 2 [1;3]                                     | 1 [0;1]                                | 0.0003             |
| Thinness                           | 16 (94)                                     | 20 (43)                                | 0.0003             |
| <b>Temporo-mandibular features</b> |                                             |                                        |                    |
| TMJ group 1                        | 2 (12)                                      | 2 (4)                                  | ns                 |
| TMJ group 2                        | 12 (71)                                     | 8 (17)                                 | < 0.0001           |
| TMJ group 3                        | 10 (59)                                     | 3 (7)                                  | 3.10 <sup>-5</sup> |
| Total TMJ                          | 14 (82)                                     | 11 (24)                                | < 0.0001           |
| Pain                               | 7 (41)                                      | 3 (100)                                | ns                 |
| <b>Dental features</b>             |                                             |                                        |                    |
| Pulp shape modification            | 15 (94)                                     | 23 (50)                                | 0.0020             |
| Root fusion                        | 12 (75)                                     | 14 (30)                                | 0.0019             |
| Exceeding root length              | 8 (50)                                      | 9 (20)                                 | 0.0262             |
| DFMT                               | 11 (69)                                     | 1 (2)                                  | 10 <sup>-7</sup>   |
|                                    | 4 [2;11]                                    | 7 [2;9]                                | ns                 |

Plaque index is defined by (number of tooth with plaque/total number of tooth) x100. Gingival Index is defined by extent of gingival inflammation and staged from 0 to 3. DMF-T index [28] is defined by decayed, missing and filled teeth, and ranges from 0 to 28 according to number of diseased teeth.

Abbreviations: DMF-T: “decayed/missing/filled teeth-index”; TMJ: temporo-mandibular joint; vEDS: vascular Ehlers-Danlos syndrome.

**Table 2. Oral signs significantly associated to vascular Ehlers-Danlos syndrome after logistic regression and the deducted oral score.**

| Variable                   | Parameter Estimate | OR     | 95% CI       | p-value |
|----------------------------|--------------------|--------|--------------|---------|
| Intercept                  | -4.7               |        |              |         |
| TMJ-D group 3              | 3.4                | 29.5   | [2.2-389.6]  | 0.0101  |
| Pulp shape modification    | 2.6                | 14.0   | [1.0-193.8]  | 0.0488  |
| Increased root length      | 5.5                | 256.1  | [9.5->999.9] | 0.0009  |
| <b>Oral score</b>          |                    |        |              |         |
| A. TMJ group 3             |                    | No (0) |              | Yes (1) |
| B. Pulp shape modification |                    | No (0) |              | Yes (1) |
| C. Exceeding root length   |                    | No (0) |              | Yes (2) |

Oral score (A+B+C):

If score = 0 or 1, negative result

If score > 1, positive result

Abbreviations: CI : Confidence Interval ; TMJ-D: temporo-mandibular joint disorder ; OR : Odds ratio.

**Table 3. Type of *COL3A1* mutation, first major complication and oral score of the 17 patients with vascular Ehlers-Danlos syndrome.**

| Patient | Age (years) | Sex (M/F) | <i>COL3A1</i> mutation       |                  | First major complication | Oral score |
|---------|-------------|-----------|------------------------------|------------------|--------------------------|------------|
|         |             |           | DNA                          | Protein          |                          |            |
| 1       | 49          | F         | c.665G>A                     | p.Gly222Asp      | U                        | 4          |
| 2       | 30          | F         | c.2285G>A                    | p.Gly762Asp      | V                        | NA         |
| 3       | 23          | M         | c.575G>A                     | p.Gly192Asp      | D                        | 3          |
| 4       | 46          | F         | c.575G>A                     | p.Gly192Asp      | D                        | 2          |
| 5       | 19          | F         | c.1241G>T                    | p.Gly414Val      | V                        | 4          |
| 6       | 44          | F         | c.647G>C                     | p.Gly216Ala      | U                        | 4          |
| 7       | 33          | F         | c.1662+1 G>A                 | exon 23 skipping | D                        | 4          |
| 8       | 20          | F         | c.3364-2 A>G                 | exon 46 skipping | N                        | 3          |
| 9       | 55          | F         | c.755G>T                     | p.Gly252Val      | U                        | 4          |
| 10      | 20          | F         | c.755G>T                     | p.Gly252Val      | N                        | 3          |
| 11      | 37          | M         | c.952-106_996+45delinsGCTTAA | exon 14 skipping | V                        | 2          |
| 12      | 40          | F         | c.951+1G>A                   | exon 13 skipping | V                        | 3          |
| 13      | 24          | F         | c.1662+1 G>A                 | exon 23 skipping | V                        | 2          |
| 14      | 34          | M         | c.2150G>A                    | p.Gly717Asp      | V                        | 2          |
| 15      | 24          | F         | c.898-1G>C                   | exon 13 skipping | V                        | 2          |
| 16      | 50          | M         | c.2671G>A                    | p.Gly891Arg      | V                        | 0          |
| 17      | 29          | M         | c.1330G>A                    | p.Gly444Arg      | V                        | 1          |

The independent oral variables associated to vascular Ehlers-Danlos syndrome were integrated into an oral score and each significant variable weighted according to the significance of the statistical association.

Abbreviations: D: Digestive; DNA: desoxyribonucleic acid; F: Female; M: Male; N: None; U: Uterine; V: Vascular.

# Figure 1

1  
2  
3  
4  
5  
6  
7  
8  
9  
10  
11  
12  
13  
14  
15  
16  
17  
18  
19  
20  
21  
22  
23  
24  
25  
26  
27  
28  
29  
30  
31  
32  
33  
34  
35  
36  
37  
38  
39  
40  
41  
42  
43  
44  
45  
46  
47  
48  
49  
50  
51  
52  
53  
54  
55  
56  
57  
58

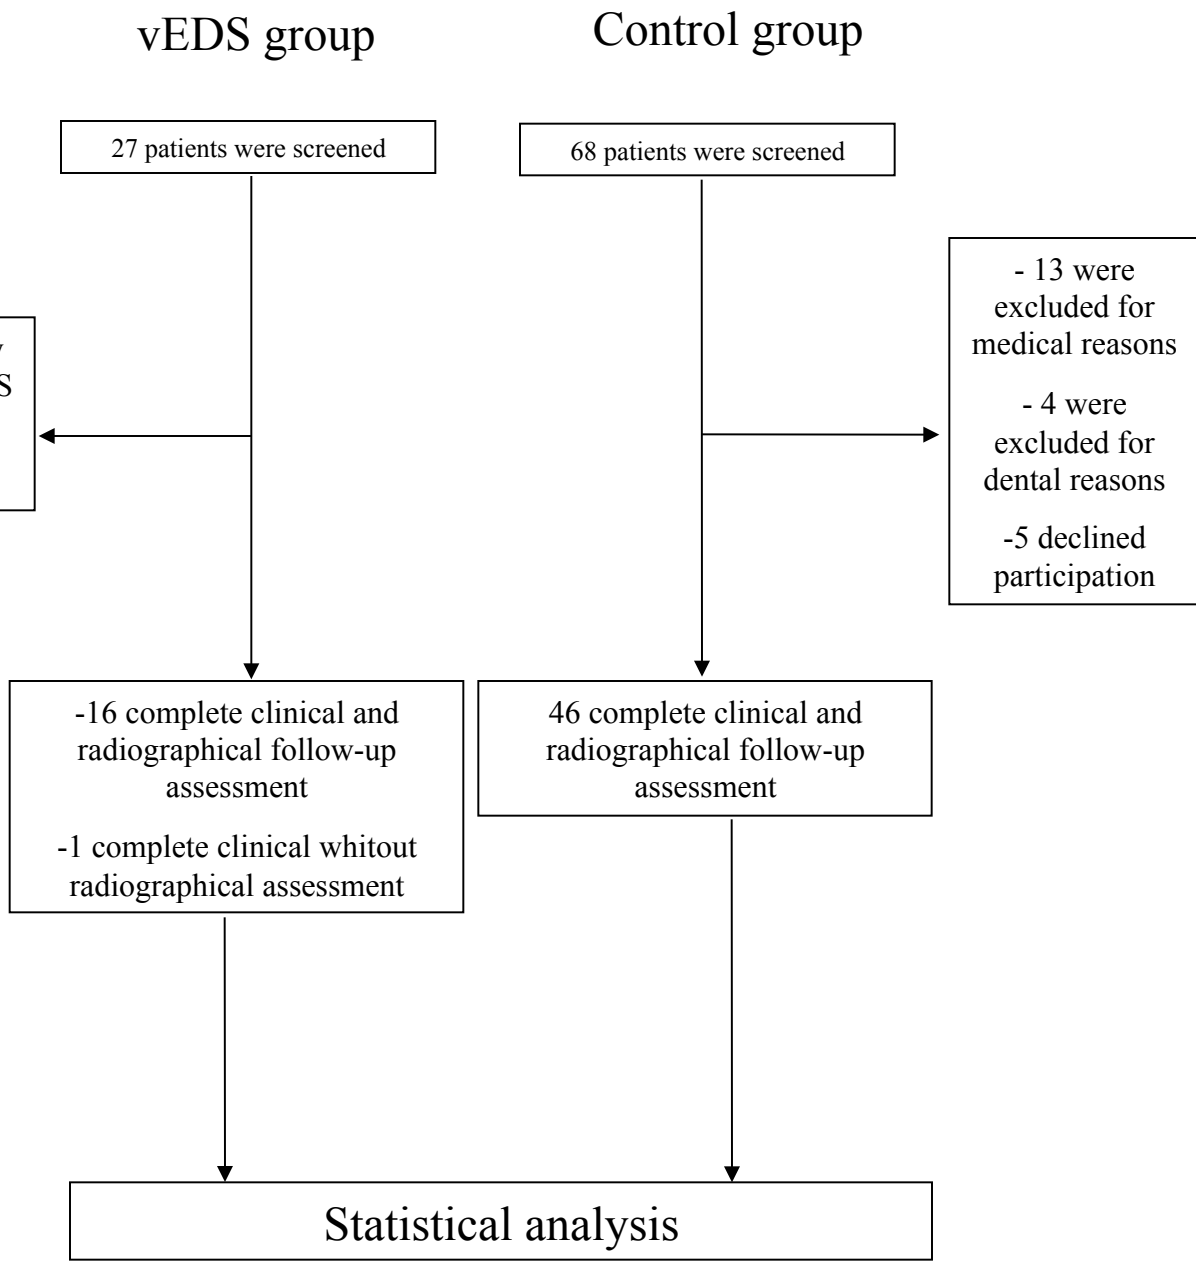

Figure 2

1  
2  
3  
4  
5  
6  
7  
8  
9  
10  
11  
12  
13  
14  
15  
16  
17  
18  
19  
20  
21  
22  
23  
24  
25  
26  
27  
28  
29  
30  
31  
32  
33  
34  
35  
36  
37  
38  
39  
40  
41  
42  
43  
44  
45  
46  
47  
48  
49  
50  
51  
52  
53  
54  
55  
56  
57  
58

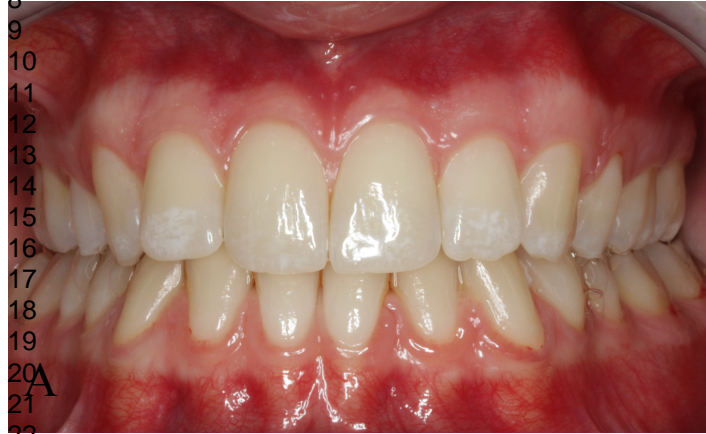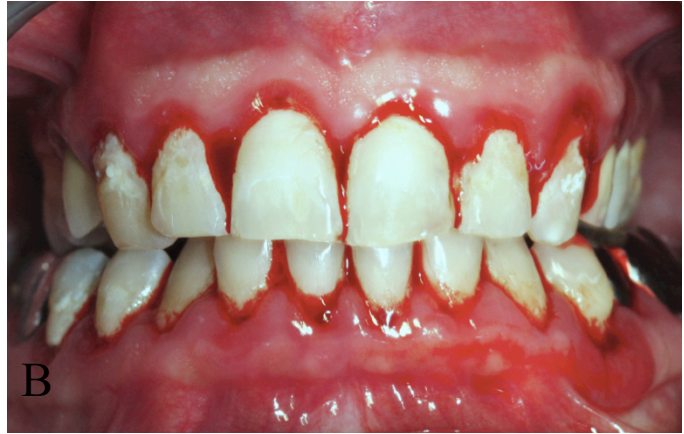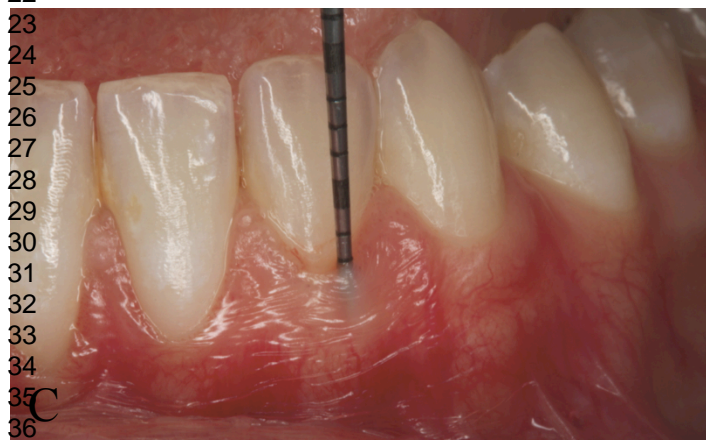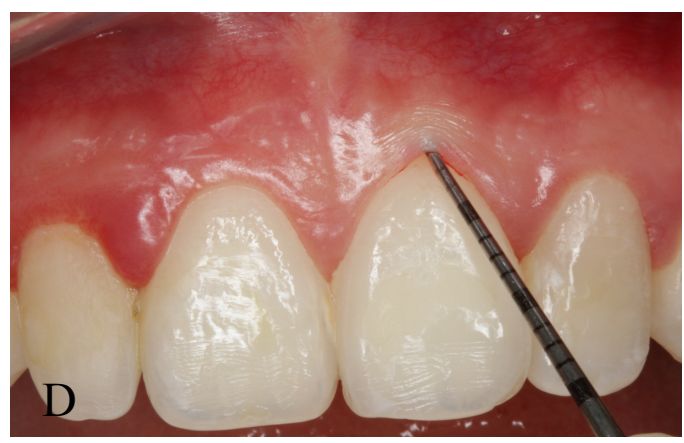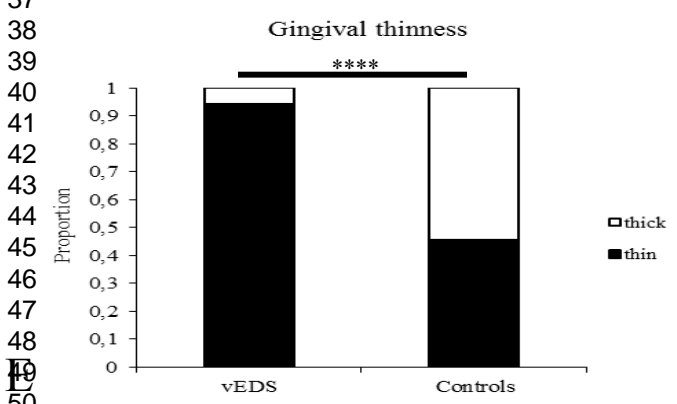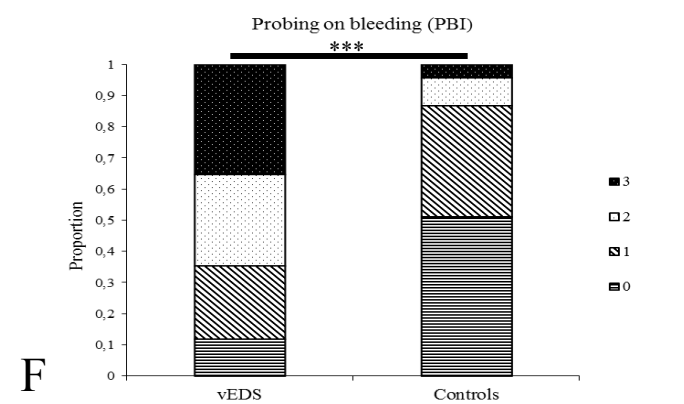

# Figure 3

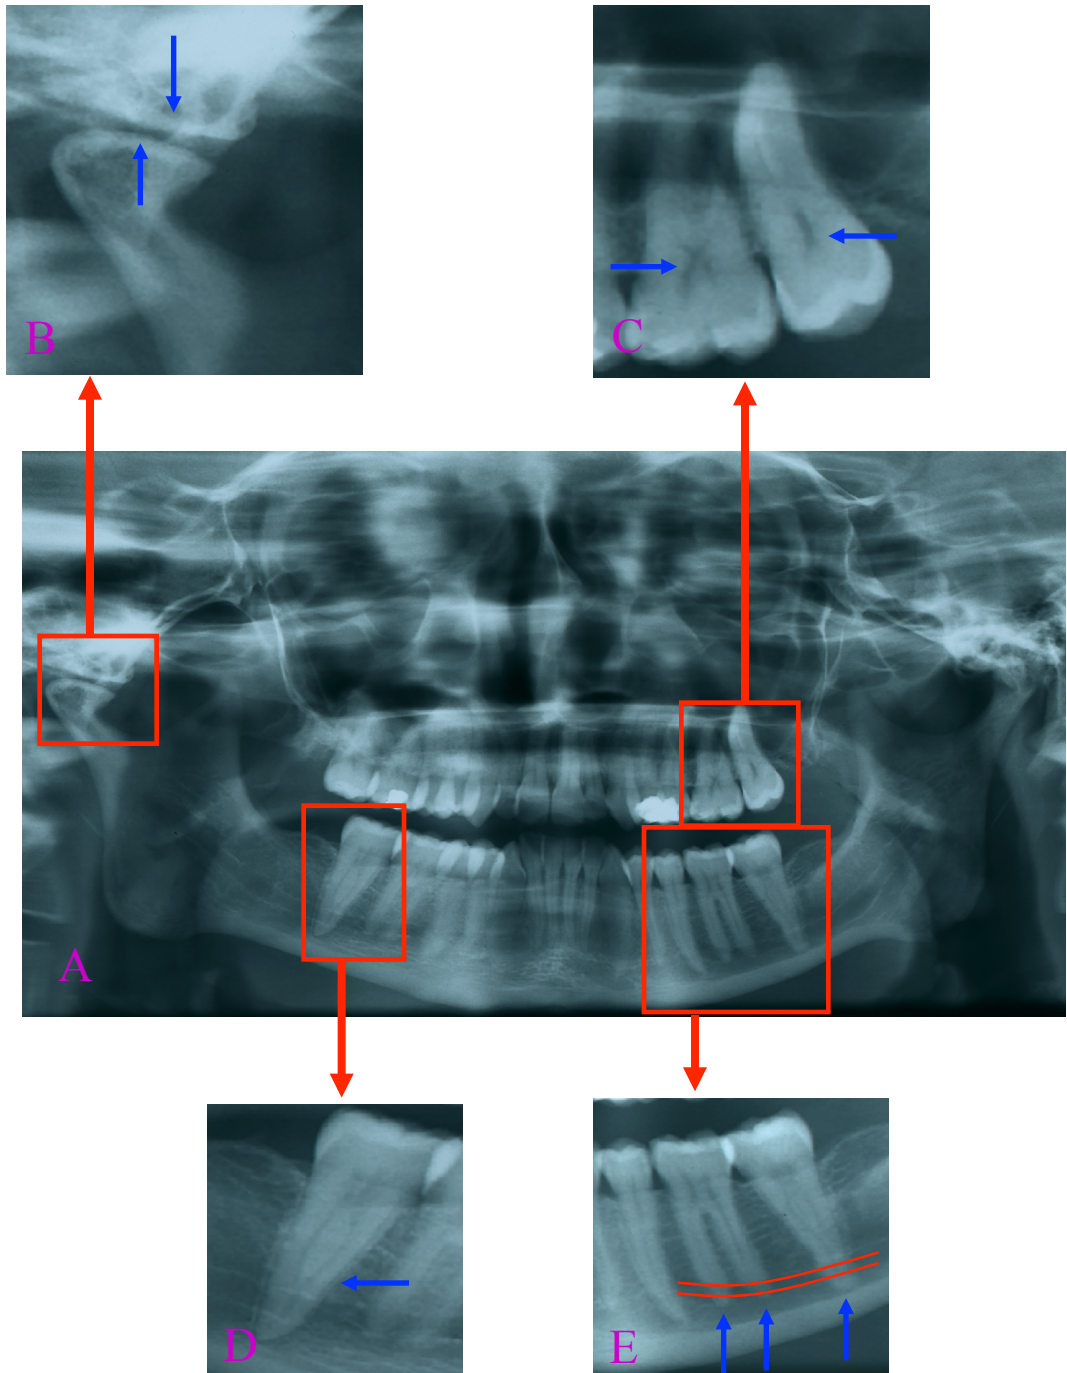

1  
2  
3  
4  
5  
6  
7  
8  
9  
10  
11  
12  
13  
14  
15  
16  
17  
18  
19  
20  
21  
22  
23  
24  
25  
26  
27  
28  
29  
30  
31  
32  
33  
34  
35  
36  
37  
38  
39  
40  
41  
42  
43  
44  
45  
46  
47  
48  
49  
50  
51  
52  
53  
54  
55  
56  
57  
58



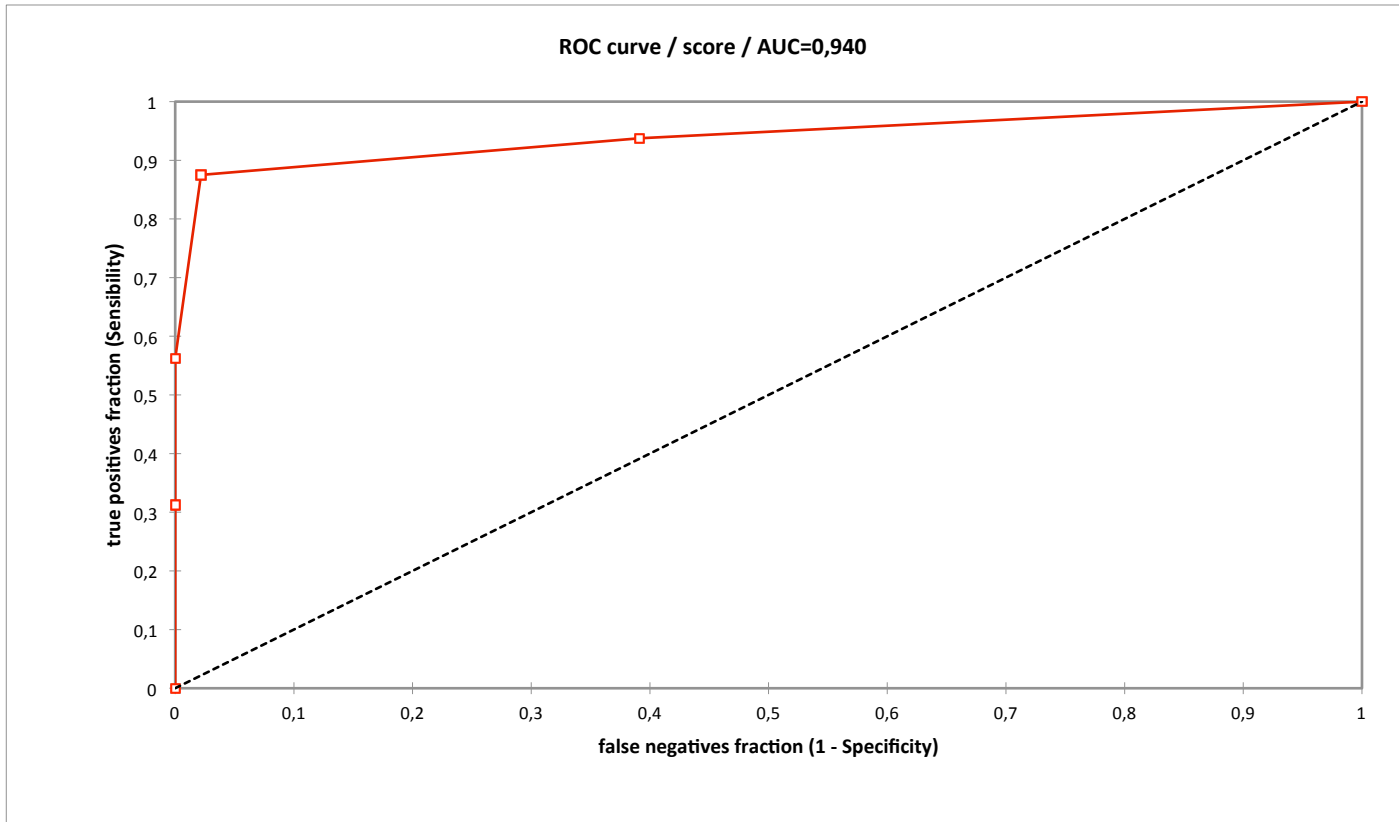

1  
2  
3  
4  
5  
6  
7  
8  
9  
10  
11  
12  
13  
14  
15  
16  
17  
18  
19  
20  
21  
22  
23  
24  
25  
26  
27  
28  
29  
30  
31  
32  
33  
34  
35  
36  
37  
38  
39  
40  
41  
42  
43  
44  
45  
46  
47  
48  
49

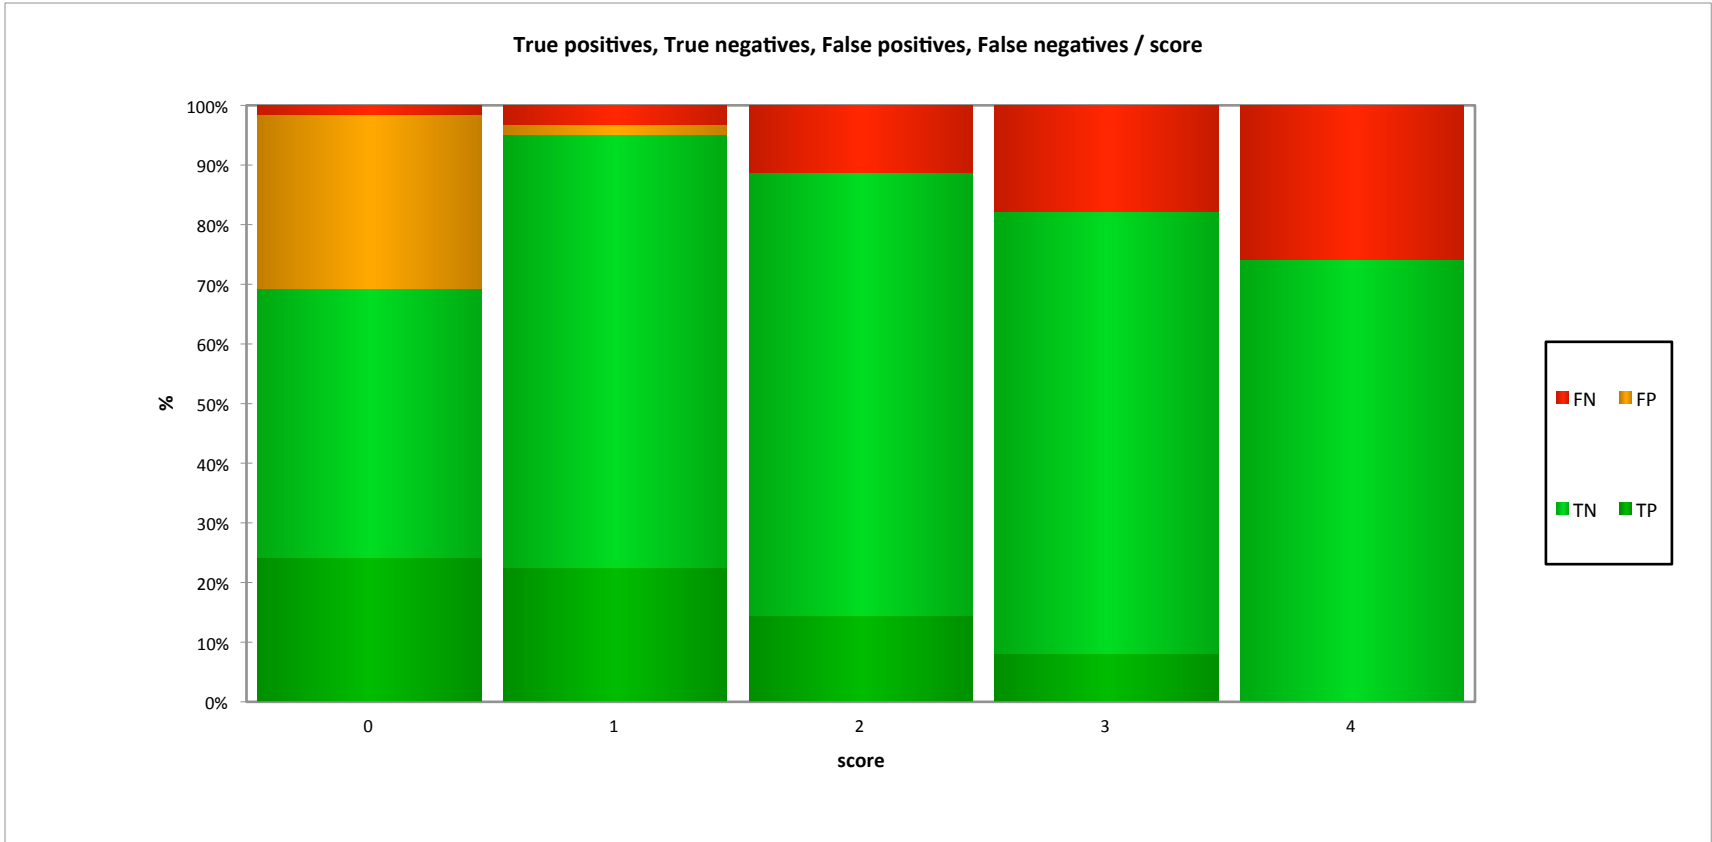





## Oral phenotype and scoring of vascular Ehlers-Danlos Syndrome: a case control study

|                                 |                                                                                                                                                                                                                                                                                                                                                                                                                                                                                                                                                                                                                                                                                                                                                                                                                                                                                                                                                                                                                                                                                                                                                                                                    |
|---------------------------------|----------------------------------------------------------------------------------------------------------------------------------------------------------------------------------------------------------------------------------------------------------------------------------------------------------------------------------------------------------------------------------------------------------------------------------------------------------------------------------------------------------------------------------------------------------------------------------------------------------------------------------------------------------------------------------------------------------------------------------------------------------------------------------------------------------------------------------------------------------------------------------------------------------------------------------------------------------------------------------------------------------------------------------------------------------------------------------------------------------------------------------------------------------------------------------------------------|
| Journal:                        | <i>BMJ Open</i>                                                                                                                                                                                                                                                                                                                                                                                                                                                                                                                                                                                                                                                                                                                                                                                                                                                                                                                                                                                                                                                                                                                                                                                    |
| Manuscript ID:                  | bmjopen-2011-000705.R1                                                                                                                                                                                                                                                                                                                                                                                                                                                                                                                                                                                                                                                                                                                                                                                                                                                                                                                                                                                                                                                                                                                                                                             |
| Article Type:                   | Research                                                                                                                                                                                                                                                                                                                                                                                                                                                                                                                                                                                                                                                                                                                                                                                                                                                                                                                                                                                                                                                                                                                                                                                           |
| Date Submitted by the Author:   | 27-Jan-2012                                                                                                                                                                                                                                                                                                                                                                                                                                                                                                                                                                                                                                                                                                                                                                                                                                                                                                                                                                                                                                                                                                                                                                                        |
| Complete List of Authors:       | Ferré, François; Assistance publique-hôpitaux de Paris (AP-HP), Dental department, Hopital H.Mondor-A.Chenevier<br>Frank, Michael; Centre de Référence des Maladies Vasculaires Rares Gogly, Bruno; Assistance publique-hôpitaux de Paris (AP-HP), Dental department, Hopital H.Mondor-A.Chenevier<br>Golmard, Lisa; Centre de Référence des Maladies Vasculaires Rares Naveau, Adrien; Assistance publique-hôpitaux de Paris (AP-HP), Dental department, Hopital H.Mondor-A.Chenevier<br>Chérifi, Hafida; Assistance publique-hôpitaux de Paris (AP-HP), Dental department, Hopital H.Mondor-A.Chenevier<br>Emmerich, Joseph; Centre de Référence des Maladies Vasculaires Rares Gaultier, Frédéric; Assistance publique-hôpitaux de Paris (AP-HP), Dental department, Hopital H.Mondor-A.Chenevier<br>Berdal, Ariane; : Université Paris Descartes, Sorbonne Paris Cité, UMR S872, 75006 France Centre de Recherche des Cordeliers, Université Pierre et Marie Curie, UMR S872 INSERM U872, team 5<br>Jeunemaître, Xavier; Centre de Référence des Maladies Vasculaires Rares Fournier, Benjamin; Assistance publique-hôpitaux de Paris (AP-HP), Dental department, Hopital H.Mondor-A.Chenevier |
| <b>Primary Subject Heading</b>: | Dentistry and oral medicine                                                                                                                                                                                                                                                                                                                                                                                                                                                                                                                                                                                                                                                                                                                                                                                                                                                                                                                                                                                                                                                                                                                                                                        |
| Secondary Subject Heading:      | Genetics and genomics, Diagnostics                                                                                                                                                                                                                                                                                                                                                                                                                                                                                                                                                                                                                                                                                                                                                                                                                                                                                                                                                                                                                                                                                                                                                                 |
| Keywords:                       | ORAL MEDICINE, VASCULAR MEDICINE, MOLECULAR BIOLOGY                                                                                                                                                                                                                                                                                                                                                                                                                                                                                                                                                                                                                                                                                                                                                                                                                                                                                                                                                                                                                                                                                                                                                |
|                                 |                                                                                                                                                                                                                                                                                                                                                                                                                                                                                                                                                                                                                                                                                                                                                                                                                                                                                                                                                                                                                                                                                                                                                                                                    |

SCHOLARONE™  
Manuscripts

1  
2  
3 Oral phenotype and scoring of vascular Ehlers-Danlos Syndrome: a  
4  
5  
6 case control study  
7  
8  
9

10  
11 FERRE FC <sup>1,3</sup>, FRANK M <sup>2</sup>, GOGLY B <sup>1,3</sup>, GOLMARD L <sup>2</sup>, NAVEAU A <sup>1,3</sup>, CHERIFI H <sup>1,3</sup>,  
12  
13 EMMERICH J <sup>2,4</sup>, GAUTIER F <sup>1</sup>, BERDAL A <sup>3</sup>, JEUNEMAITRE X <sup>2,5</sup>, FOURNIER BPJ <sup>1,3</sup>  
14  
15

16  
17  
18 1 : A.Chenevier- H.Mondor hospital, Dental department, Créteil, France  
19 2 : Centre de Référence des Maladies Vasculaires Rares, HEGP, Paris, France  
20 3 : Université Paris Descartes, Sorbonne Paris Cité, UMR S872, 75006 France  
21 Centre de Recherche des Cordeliers, Université Pierre et Marie Curie, UMR S872  
22 INSERM U872, Paris, France  
23 4 : INSERM U765, Paris, France  
24 5 : INSERM U970, P.A.R.C.C.,Paris, France  
25  
26  
27

28  
29 **Corresponding author:** Dr Ferré François, DDS  
30 A.Chenevier/H.Mondor hospital, Dental department  
31 40 rue Mesly, 94 000 Créteil, France  
32 Mail to: ferrefrancois@hotmail.com  
33  
34  
35  
36  
37  
38  
39  
40  
41  
42  
43  
44  
45  
46  
47  
48  
49  
50  
51  
52  
53  
54  
55  
56  
57  
58  
59  
60

## Summary

### Article Focus

- To provide physicians with an in-depth description oral involvement of patients with vascular Ehlers-Danlos syndrome.
- To evaluate specificity of gingival recession, a minor diagnostic criterion for vEDS in the Villefranche classification-

### Key Messages

- Prevalence of gingival recession and periodontitis was low among patients with vEDS.
- Conversely, patients showed marked gingival fragility, temporo-mandibular joint disorders, dentin formation defects, molar root fusion and increased root length.
- Several new specific oral signs of this disease were identified, whose combination may be of greater diagnostic value.

### Strengths and Limitations

- All screened patients had genetically confirmed vascular Ehlers-Danlos syndrome.
- Limited sample size, sex ratio imbalance, pre-adult patients were not included. Validation studies are necessary.

**ABSTRACT**

**Objective:** Vascular Ehlers-Danlos syndrome (vEDS) is a rare genetic condition related to mutations in the *COL3A1* gene, responsible of vascular, digestive and uterine accidents. Difficulty of clinical diagnosis has led to the design of diagnostic criteria, summarized in the Villefranche classification. Our goal was to assess oral features of vEDS. Gingival recession is the only oral sign recognized as a minor diagnostic criterion. We aimed to check this assumption, since bibliographical search related to gingival recession in vEDS proved scarce.

**Design:** prospective case-control study

**Setting:** Dental surgery department in a French tertiary hospital.

**Participants:** 17 consecutive patients with genetically proven vascular Ehlers-Danlos syndrome, aged 19 to 55 years were compared to 46 age and sex-matched controls.

**Observations:** Complete oral examination (clinical and radiological) with standardized assessment of periodontal structure, temporo-mandibular joint function and dental characteristics were performed. *COL3A1* mutations were identified by direct sequencing of genomic or complementary DNA.

**Results:** Prevalence of gingival recession was low among patients with vEDS, as for periodontitis. Conversely, patients showing marked gingival fragility, temporo-mandibular disorders, dentin formation defects, molar root fusion and increased root length. After logistic regression, 3 variables remained significantly associated to vEDS. These variables were integrated in a diagnostic oral score with 87.5% and 97% sensitivity and specificity respectively.

**Conclusion:** Gingival recession is an inappropriate diagnostic criterion for vEDS. Several new specific oral signs of the disease were identified, whose combination may be of greater value in diagnosing vascular Ehlers-Danlos syndrome.

1  
2  
3 **Key words (MeSH):** Ehlers-Danlos syndrome, vascular type; Oral, Diagnostic Tests, General  
4  
5 practice.  
6  
7  
8  
9  
10  
11  
12  
13  
14  
15  
16  
17  
18  
19  
20  
21  
22  
23  
24  
25  
26  
27  
28  
29  
30  
31  
32  
33  
34  
35  
36  
37  
38  
39  
40  
41  
42  
43  
44  
45  
46  
47  
48  
49  
50  
51  
52  
53  
54  
55  
56  
57  
58  
59  
60

For peer review only

## INTRODUCTION

Vascular Ehlers-Danlos syndrome (vEDS OMIM # 130050) is a rare genetic condition with an estimated prevalence of 1/150,000 [1]. Its clinical course is the most severe amongst the Ehlers-Danlos syndromes. The inheritance of vEDS follows an autosomal dominant trait, and is related to mutations in the *COL3A1* gene, encoding the pro- $\alpha$  (1) chain of type III procollagen [1]. The mutation typically alters the assembly, stability and thus secretion and resistance to tensile stress of this fibrillar collagen, resulting in early spontaneous arterial, digestive and obstetrical accidents. Over 250 different mutations have been described in the *COL3A1* gene, typically either missense mutations affecting a glycine residue, splicing mutations or rare exonic deletions [2]. No genotype-phenotype correlations have been evidenced, except for haploinsufficiency, which may be characterized by a consistently milder phenotype [3].

Oral involvement is frequently present in patients with vEDS, **even in early adulthood**, described as gingival recession [4]. This oral sign of the disease, despite being part of the minor diagnostic criteria of the Villefranche classification [4] remains poorly documented and no in-depth description of the proposed occurrence of gingival recession in the vEDS diagnostic criteria was found in previously published reports.

In this study, we aimed to reassess oral involvement in a cohort of patients with molecularly proven vEDS (i.e. with **proven** *COL3A1* mutations). We hypothesised that a systematic assessment of dental, gingival and osteo-articular characteristics of these patients would show significant differences with age- and sex-matched controls.

## METHODS

### Study design

This study was designed according to guidelines of the STROBE statement. Consecutive patients with molecularly proven vEDS and healthy volunteers were prospectively included in a monocentric case-control study. Each patient was appointed for a routine dental visit. Detailed standardized clinical records on teeth and surrounding soft tissues were made by a senior dental surgeon. Most of the time, physicians were aware of the patient's diagnostic status upon inclusion except for patients that were in diagnostic work-up with genetic testing in progress. Standardized dental X-rays were performed for each subject which included periapical X-rays of the upper and lower jaws for detection of root and surrounding bone structure, positional assessment of emerged and emerging teeth, and temporomandibular joint imaging by orthopantomogram (OPG). Intra-oral pictures were made for all patients. All examinations were performed for clinical care and diagnostic purpose.

### Study population

Patients with genetically diagnosed vEDS from the Centre de Référence des Maladies Vasculaires Rares (Hôpital Européen Georges Pompidou, Assistance Publique des Hôpitaux de Paris, Paris, France), the French national referral centre for patients with vEDS, were sent to the Dental Department of Albert Chenevier Henri-Mondor university hospital for dental care. Patients with suspected vEDS referred for dental status assessment without mutation in the *COL3A1* gene were excluded of the study after screening. The control group was constituted by random inclusion of consecutive healthy subjects that consulted the dental department for clinical care. Control subjects had no medical history, especially no suspicion of connective tissue disorder, and were referred for general dentistry purposes. Patients of the

1  
2  
3 control group were age- and sex-matched with the vEDS patients in a ratio close to 3 to 1. To  
4  
5 limit the possibility of confounders of gingival bleeding or temporo-mandibular disorders, 3  
6  
7 common oral indexes were measured at baseline: plaque index, gingival index, and  
8  
9 decayed/missing/filled teeth (DMF-T) index.  
10

### 11 12 13 **Medical and Genetical data.**

14  
15  
16 Patients included in this study were clinically assessed by senior physicians of the  
17  
18 French referral centre for rare vascular diseases (see above). Patient history and clinical  
19  
20 characteristics of vEDS were systematically assessed by a standardized observation. Number  
21  
22 and type of vascular, digestive and uterine complications were recorded. Major and minor  
23  
24 clinical diagnostic criteria were staged according to the Villefranche classification [4].  
25  
26 Genomic DNA was obtained by saline extraction from whole blood leucocytes. The *COL3A1*  
27  
28 gene was then analyzed by direct sequencing as previously described [2]. In case of negative  
29  
30 direct DNA sequencing, patients were screened for exon skipping by fibroblast culture, RNA  
31  
32 extraction, reverse transcription and polymerase chain reaction (RT-PCR), and direct  
33  
34 sequencing [2]. All patients gave written informed consent. Mutations are described according  
35  
36 to the nomenclature recommended by the Human Genome Variation Society. DNA mutation  
37  
38 numbering was based on *COL3A1* human cDNA sequence (GenBank NM\_000090.3).  
39  
40  
41  
42  
43  
44  
45  
46  
47  
48  
49  
50  
51  
52  
53  
54  
55  
56  
57  
58  
59  
60



## Oral examination

**Periodontal status.** The periodontal data consisted in standardized measurement of gingival fragility, thickness, recession and surface texture. Fragility and bleeding tendency was assessed by a periodontal probe and staged according to Loe and Silness [5]. History of and ongoing gingival bleeding and its frequency during tooth brushing as described by patients was recorded. Gingival thickness was measured by the ability to see the graded periodontal probe through gingival tissue [6]. Recessions of the gingival margin in respect of the cemento-enamel junction were measured at six different sites per tooth. The gum surface texture (stippling) was assessed visually and evaluated qualitatively. Diagnosis of periodontitis was checked clinically and radiologically. Periodontal pockets were evaluated by probing and alveolar bone level was assessed by X-rays in order to detect horizontal and angular bone loss.

**Dental status.** Teeth were clinically and radiologically assessed for structural abnormalities and secondary lesions (decay, traumatic injury...), as well as root fusion and pulp volume, defined by the pulp to crown area ratio as measured on retro-alveolar X-Rays. Root length of mandibular teeth was defined as normal when stopping before the upper limit of the mandibular canal which is easily visible on the OPG, and as long when crossing it.

**Temporo-mandibular joint (TMJ) status.** History of oro-facial pain originating either from the masticatory muscles or the joint capsula was recorded, including reports of pain in the jaw, temples, face, pre-auricular area or the TMJ both at rest and in function. Physical examination included the observation and measurements of mandibular motion (maximal interincisal opening, lateral movements and protrusion), palpation of the masticatory muscles (masseter, temporalis, medial and lateral pterygoid muscles), and static and dynamic TMJ palpation. During mandibular motions, noises were staged as follows:

1  
2  
3 “clicking”, “popping” as a consequence of disk displacement, and “crunching”, “grating”  
4  
5 and/or “grinding” as a consequence of osteoarthritis. Joint surfaces were studied on OPGs, in  
6  
7 search of extensive flattening or sclerosis of the articular surfaces. TMJ disorders were then  
8  
9 staged according to validated international guidelines (Research Diagnostic Criteria for  
10  
11 Temporo-Mandibular Disorders, RDC/TMD) as previously described by Dworkin et al. [7].  
12  
13 Briefly, three groups are individualized by this classification: muscle disorders (group 1), disk  
14  
15 displacements (group 2) and arthralgia/arthritis/arthrosis (group 3). These clinical indicators  
16  
17 allow a stratification of TMD for each subject, for each group may be present separately or in  
18  
19 association with one other.  
20  
21  
22  
23  
24

### 25 **Statistical analysis**

26  
27 Descriptive statistics used numbers and percentages for qualitative variables and  
28  
29 median and inter-quartiles ranges intervals for quantitative ones. The comparison between  
30  
31 groups was performed using chi-square tests or Fisher’s exact tests for qualitative variables  
32  
33 and two-sample Wilcoxon tests for quantitative ones. Variables with a p-value < 0.10 in the  
34  
35 first step were then entered in a step-wise logistic regression. Variables with a p-value < 0.06  
36  
37 using the Wald test were retained in the final model. A simplified diagnostic score with 5  
38  
39 levels was built from the results of the logistic model. The ROC curve of this simplified  
40  
41 diagnostic score was computed, a threshold was determined, and sensitivity and specificity  
42  
43 were evaluated using this threshold, with their exact 95 % confidence intervals. All the tests  
44  
45 were two-sided, with a p-value considered significant when < 0.05. All the computations were  
46  
47 performed using the SAS® V9.2 statistical package (SAS Institute Inc., Cary, NC, USA.)  
48  
49  
50  
51  
52  
53  
54  
55  
56  
57  
58  
59  
60

## RESULTS

### Participants

Between November 2009 and June 2011, 27 consecutive patients with suspected or confirmed vEDS were referred for dental examination. Patients without genetic confirmation of vEDS (n=6) were not considered eligible for participation. Of the 21 remaining patients, four declined participation and 17 were finally included (Figure 1). In one patient, OPG was unavailable and therefore excluded from the design of the oral score. Control subjects (n=68) were screened for an inclusion ratio of 3 to 1. Five subjects declined participation and 17 were considered ineligible for medical reasons (i.e pregnancy, diabetes ...), or dental status (full edentulous or severe periodontitis), leaving 46 controls that completed the study. Baseline characteristics of vEDS patients and controls are shown in table 1. Dental status of vEDS and control patients were equivalent as shown by the DMF-T index. The plaque and gingival indexes, source of confounding bias in specificity of gingival bleeding did not differ significantly between both groups.

### Periodontal status

Gingival recession was less frequent in patients (n=7; 41.2%) than in controls (n= 31; 67.3%). Periodontitis was present in 23.5% (n=4) vEDS patients only when compared to controls (n=21; 45%). Presentation of gingiva in vEDS patients was evocative of a particular periodontal phenotype rather than common dental or periodontal disease. This phenotype was characterised by a generalized thinness of both gingiva and oral mucosa, and translucency of the gingiva with apparent vasculature (Figure 2A, C). Overall, increased gingival thinness was present in 16 (94%) patients versus 20 (43.3%) controls. Gingival surface texture was also evocative, with a decreased stippling and a papyraceous aspect when pressuring the gum with the dental probe (Figure 2D). These characteristics were associated with an increase in

gingival fragility, as measured by bleeding on probing during gingival thinness assessment (Figure 2B, F, Table 1).

### **TMJ status**

Temporo-mandibular joint disorders were present in 14 (82%) patients with vEDS and in 11 (24%) controls ( $p < 0.0001$ ) (Table 1). Almost half of patients (41%) described TMJ pain whereas it was reported in only 3 (6.5%) controls. Pain originated from the masticatory muscles or the temporo-mandibular joint itself (groups 1 and 3 in the TMD classification [7]), and were described as a discomfort during mastication or yawning. 71% of the vEDS patients presented significant intra-articular disc displacement with reduction associated to clicking (group 2). Premature remodelling of the TM articular surfaces (Figure 3B) was present in 7 out of 16 (43.8%) patients, versus 2 (4.3%) in controls ( $p = 0.0086$ ). This last finding was highly prevalent in vEDS patients whereas it was uncommon in controls.

### **Dental findings**

Dental abnormalities observed in patients with vEDS were related to defects in dentin formation rather than to common dental pathology (Table 1). X-ray analysis revealed a significant reduction in pulp volume (Figure 3C) secondary to progressive pulp obliteration by dentin synthesis. Pulpar volume decreases physiologically with aging in the general population [8], yet it was repeatedly observed in young vEDS patients of this cohort. Furthermore, 75% of vEDS patients presented retraction of the dental pulp shape versus 29.8% of controls (Table 1). Molar root fusion was also more frequently present, particularly in the mandibular second molar (50 %) (Figure 3D) when compared to controls (19.5%).

1  
2  
3 Mandibular dental root length was significantly increased in a large proportion of  
4  
5 vEDS patients. Increased root length was most often found on the second mandibular molar  
6  
7 (n=11/16) whereas such an observation was only exceptional in controls (n=1/46), more  
8  
9 rarely on mandibular premolars or the first molar. This sign is very easily identifiable by any  
10  
11 physician on the OPG (Figure 3E).  
12

### 13 14 15 16 **Oral score**

17  
18 Three oral characteristics remained significantly associated to vEDS after logistic  
19  
20 regression: increased root length, modified dental pulp shape and arthralgia/arthrosis (TMJ  
21  
22 disorder group 3). These variables were staged into a diagnostic score according to results of  
23  
24 the logistic model (Table 2): increased root length was weighted 2, and the two remaining  
25  
26 variables were weighted 1. Signs were either present (scoring either 1 or 2), either not present  
27  
28 (scoring 0). The total score is the result of adding weighted values of present signs. A score of  
29  
30 0 or 1 was considered negative and a score of 2 to 4 was considered positive with a sensitivity  
31  
32 and specificity of 0.878 95%CI [0.604-0.978] and 0.978 95%CI [0.870-0.999%] respectively  
33  
34 (Table 2 and supplemental data 2).  
35  
36  
37  
38  
39  
40  
41  
42  
43  
44  
45  
46  
47  
48  
49  
50  
51  
52  
53  
54  
55  
56  
57  
58  
59  
60

## DISCUSSION

This case control study is the first specific report of oral involvement in patients with genetically confirmed patients with vascular Ehlers-Danlos syndrome. We evidenced that gingival recession may be an inappropriate diagnostic criterion of vEDS, whereas several other original findings may be of greater diagnostic value: increased dental root length, TMJ pain and premature arthrosis and a decreased pulp to crown area ratio. The first two criteria are easily identifiable by any physician on an OPG and on physical examination. The third requires either a short specific training on reading retro-alveolar X-rays, or a specific, but simple evaluation by a dental surgeon.

Oral mucosa and gingival thinness has to be considered as an aspect of the general phenotype of vEDS. Indeed, typical skin involvement is marked by increased thinness with consequent translucency [9] and by increased fragility, illustrated by the occurrence of extensive spontaneous haematomas and delayed papyraceous wound healing. A decreased intima-media thickness of elastic arteries in vEDS may be another phenotypic expression [10]. Similarly to the skin, type III collagen is present in the gingival connective tissue near the basement membrane and blood vessels [9]. Consequently, the disturbance of type III collagen production/secretion by the gingival fibroblast population, besides the physical and thermal stress the gum is exposed to and which may alter type III collagen [13], may explain in part the increase of gingival thinness [11, 12], and thus its fragility and bleeding tendency. Possible involvement of type III collagen in platelet adhesion would be a further precipitating factor for bleeding [14].

Dental abnormalities and particularly radicular abnormalities as increased root length that has been repeatedly evidenced in our patients may be specific of the disease, as this condition is exceptional in the general population and therefore its random finding would

1  
2  
3 have been unlikely in the vEDS group. Type III collagen is necessary to type I collagen  
4  
5 fibrillogenesis [15]. Other collagen gene mutations are reported to be associated with oral and  
6  
7 dental abnormalities: type I collagen chain gene mutations are associated with type I  
8  
9 dentinogenesis imperfecta in the more general context of osteogenesis imperfecta [16]. In this  
10  
11 case, the teeth are specifically amber and translucent. Radiographically, the teeth have short,  
12  
13 constricted roots and dentine hypertrophy leading to pulpal obliteration [16]. These diverse  
14  
15 structural defects highlight the key-role of fibrillar collagens in mineralized tissue formation.  
16  
17 An abnormal type III collagen in dental and articular tissues may also explain the dental and  
18  
19 TMJ abnormalities/disorders. Its presence within dentin remains controversial, yet it has been  
20  
21 evidenced in the epithelio-mesenchymal interface during dentinogenesis [17]. Finally, type III  
22  
23 collagen has been evidenced in the posterior region of disc attachments of the TMJ [18].  
24  
25  
26

27  
28 Previous studies have reported diverse oral signs in EDS patients but none were  
29  
30 specific to vEDS and none was dedicated to a cohort of patients with molecularly confirmed  
31  
32 vEDS [19]. The absence of genetic certainty is a major selection bias as the disease may be  
33  
34 confused with other connective tissue diseases as non vascular Ehlers-Danlos syndromes or  
35  
36 more recently evidenced Loeys-Dietz syndrome [9]. Periodontal or oral lesions were recorded  
37  
38 in several studies on patients with various non vascular subtypes of Ehlers-Danlos syndrome  
39  
40 patients, but no significant association between oral signs and EDS subtype could be  
41  
42 evidenced [20-24]. The only study reporting oral signs as a possible diagnostic tool in Ehlers-  
43  
44 Danlos syndromes was related to the classical (OMIM#130020) and hypermobile  
45  
46 (OMIM#130000 and OMIM#130010) types [25]. It was suggested that absence of the inferior  
47  
48 lingual and labial frenulas were specific and sensitive signs for these forms of EDS, yet these  
49  
50 results have been subject to controversy [26]. In our population sample, frenulas were absent  
51  
52 in approximately one third of patients.  
53  
54  
55  
56  
57  
58  
59  
60

1  
2  
3 This study has several limitations. Firstly, our analysis is based on a small number of  
4 patients. However, this limited population sample has to be considered in respect of the rarity  
5 of vEDS, as it is to our best knowledge the most important clinical study of oral involvement  
6 of the disease. Secondly, the sex ratio is unbalanced which may induce selection bias, notably  
7 for gingival thinness that is more common in women in the general population [6]. However,  
8 there is no evidence that oral signs of vEDS identified by logistic regression may be  
9 influenced by sex ratio. Furthermore patients were assigned age and sex-matched controls that  
10 may further limit any residual bias. Finally, no children or teenagers were included into this  
11 study. It is therefore not known if these findings may apply to this specific age category,  
12 which is of importance as typically the late teenage years match with the onset of digestive  
13 and arterial accidents in vEDS.  
14  
15  
16  
17  
18  
19  
20  
21  
22  
23  
24  
25  
26

27 The oral score we were able to design may be of interest for clinical diagnosis of  
28 vEDS, especially as the phenotype is usually discrete and as diagnosis may be difficult even  
29 for experienced physicians.  
30  
31  
32  
33

34 Given its high specificity and sensitivity if it were to be confirmed, its diagnostic value  
35 as a minor diagnostic criterion as defined by the Villefranche classification should be  
36 evaluated. A positive oral score associated with one major vEDS sign may indicate genetic  
37 testing of the *COL3A1* gene with a good positive predictive value. Further larger studies are  
38 necessary to determine the exact diagnostic value of gingival thinness and bleeding tendency  
39 in vEDS, as these signs were present in most patients, yet not independent predictors in our  
40 analysis. Considering the small number of vEDS patients, associations between mutation type  
41 and oral score were not tested. But interestingly, the two patients with a negative oral score  
42 had the same mutation type: an arginine substitution for glycine. This observation needs  
43 further explorations.  
44  
45  
46  
47  
48  
49  
50  
51  
52  
53  
54  
55  
56  
57  
58  
59  
60



1  
2  
3 In conclusion, our findings suggest that gingival retraction, used in the Villefranche  
4 classification, may be an inappropriate diagnostic criterion for vascular Ehlers-Danlos  
5 syndrome, and that increased root length, modified dental pulp shape and premature wear of  
6  
7 TMJ are significantly associated to vEDS. These findings, if confirmed, may implement the  
8  
9 latter in a diagnostic oral score for vEDS.  
10  
11  
12  
13

#### 14 15 16 **Author's contribution**

17 F.F., F.M., G.B., F.B. conceived and planned the study. F.M., E.J. and J.X. recruited the  
18 vEDS patients, F.F., G.B. and F.B. made the dental observations for all subjects, G.L.  
19 performed the statistical analysis; F.F., F.M., F.B., G.F., B.A., G.L., N.A. and C.H. critically  
20 reviewed and interpreted the data and results; F.F., F.M., F.B. wrote the manuscript. All  
21 authors approved the final version.  
22  
23

#### 24 **Funding statement**

25 This research received no specific grant from any funding agency in the public, commercial or  
26 not-for-profit sectors.  
27

#### 28 **Competing interest**

29 All authors declare to have no competing interest.  
30  
31  
32  
33  
34  
35  
36  
37  
38  
39  
40  
41  
42  
43  
44  
45  
46  
47  
48  
49  
50  
51  
52  
53  
54  
55  
56  
57  
58  
59  
60

## REFERENCES

1. Pepin, M., et al., *Clinical and genetic features of Ehlers-Danlos syndrome type IV, the vascular type*. N Engl J Med, 2000. **342**(10): p. 673-80.
2. Pepin, M.G. and P.H. Byers, *Ehlers-Danlos Syndrome Type IV*. 1993.
3. Leistriz, D.F., et al., *COL3A1 haploinsufficiency results in a variety of Ehlers-Danlos syndrome type IV with delayed onset of complications and longer life expectancy*. Genet Med.
4. Beighton, P., et al., *Ehlers-Danlos syndromes: revised nosology, Villefranche, 1997. Ehlers-Danlos National Foundation (USA) and Ehlers-Danlos Support Group (UK)*. Am J Med Genet, 1998. **77**(1): p. 31-7.
5. Loe, H., *The Gingival Index, the Plaque Index and the Retention Index Systems*. J Periodontol, 1967. **38**(6): p. Suppl:610-6.
6. De Rouck, T., et al., *The gingival biotype revisited: transparency of the periodontal probe through the gingival margin as a method to discriminate thin from thick gingiva*. J Clin Periodontol, 2009. **36**(5): p. 428-33.
7. Dworkin, S.F. and L. LeResche, *Research diagnostic criteria for temporomandibular disorders: review, criteria, examinations and specifications, critique*. J Craniomandib Disord, 1992. **6**(4): p. 301-55.
8. Morse, D.R., *Age-related changes of the dental pulp complex and their relationship to systemic aging*. Oral Surg Oral Med Oral Pathol, 1991. **72**(6): p. 721-45.
9. Germain, D.P., *Ehlers-Danlos syndrome type IV*. Orphanet J Rare Dis, 2007. **2**: p. 32.
10. Boutouyrie, P., et al., *Increased carotid wall stress in vascular Ehlers-Danlos syndrome*. Circulation, 2004. **109**(12): p. 1530-5.
11. Byers, P.H., et al., *Altered secretion of type III procollagen in a form of type IV Ehlers-Danlos syndrome. Biochemical studies in cultured fibroblasts*. Lab Invest, 1981. **44**(4): p. 336-41.
12. Smith, L.T., et al., *Mutations in the COL3A1 gene result in the Ehlers-Danlos syndrome type IV and alterations in the size and distribution of the major collagen fibrils of the dermis*. J Invest Dermatol, 1997. **108**(3): p. 241-7.
13. Anderson, D.W., et al., *A glycine (415)-to-serine substitution results in impaired secretion and decreased thermal stability of type III procollagen in a patient with Ehlers-Danlos syndrome type IV*. Hum Mutat, 1997. **9**(1): p. 62-3.
14. Massberg, S., et al., *A crucial role of glycoprotein VI for platelet recruitment to the injured arterial wall in vivo*. J Exp Med, 2003. **197**(1): p. 41-9.
15. Liu, X., et al., *Type III collagen is crucial for collagen I fibrillogenesis and for normal cardiovascular development*. Proc Natl Acad Sci U S A, 1997. **94**(5): p. 1852-6.
16. Barron, M.J., et al., *Hereditary dentine disorders: dentinogenesis imperfecta and dentine dysplasia*. Orphanet J Rare Dis, 2008. **3**: p. 31.
17. Bronckers, A.L., D.M. Lyaruu, and J.H. Woltgens, *Immunohistochemistry of extracellular matrix proteins during various stages of dentinogenesis*. Connect Tissue Res, 1989. **22**(1-4): p. 65-70.
18. Gage, J.P., et al., *Presence of type III collagen in disc attachments of human temporomandibular joints*. Arch Oral Biol, 1990. **35**(4): p. 283-8.
19. De Coster, P.J., L.C. Martens, and A. De Paepe, *Oral health in prevalent types of Ehlers-Danlos syndromes*. J Oral Pathol Med, 2005. **34**(5): p. 298-307.
20. Linch, D.C. and C.H. Acton, *Ehlers-Danlos syndrome presenting with juvenile destructive periodontitis*. Br Dent J, 1979. **147**(4): p. 95-6.
21. Ooshima, T., et al., *Oral manifestations of Ehlers-Danlos syndrome type VII: histological examination of a primary tooth*. Pediatr Dent, 1990. **12**(2): p. 102-6.

- 1
  - 2
  - 3
  - 4
  - 5
  - 6
  - 7
  - 8
  - 9
  - 10
  - 11
  - 12
  - 13
  - 14
  - 15
  - 16
  - 17
  - 18
  - 19
  - 20
  - 21
  - 22
  - 23
  - 24
  - 25
  - 26
  - 27
  - 28
  - 29
  - 30
  - 31
  - 32
  - 33
  - 34
  - 35
  - 36
  - 37
  - 38
  - 39
  - 40
  - 41
  - 42
  - 43
  - 44
  - 45
  - 46
  - 47
  - 48
  - 49
  - 50
  - 51
  - 52
  - 53
  - 54
  - 55
  - 56
  - 57
  - 58
  - 59
  - 60
22. Pope, F.M., et al., *Ehlers Danlos syndrome type I with novel dental features*. J Oral Pathol Med, 1992. **21**(9): p. 418-21.
23. Karrer, S., M. Landthaler, and G. Schmalz, *Ehlers-Danlos type VIII. Review of the literature*. Clin Oral Investig, 2000. **4**(2): p. 66-9.
24. Rahman, N., et al., *Ehlers-Danlos syndrome with severe early-onset periodontal disease (EDS-VIII) is a distinct, heterogeneous disorder with one predisposition gene at chromosome 12p13*. Am J Hum Genet, 2003. **73**(1): p. 198-204.
25. De Felice, C., et al., *Absence of the inferior labial and lingual frenula in Ehlers-Danlos syndrome*. Lancet, 2001. **357**(9267): p. 1500-2.
26. Shankar, S., E. Shirley, and N.P. Burrows, *Absence of inferior labial or lingual frenula is not a useful clinical marker for Ehlers-Danlos syndrome in the UK*. J Eur Acad Dermatol Venereol, 2006. **20**(10): p. 1383-4.
27. Ong, K.T., et al., *Effect of celiprolol on prevention of cardiovascular events in vascular Ehlers-Danlos syndrome: a prospective randomised, open, blinded-endpoints trial*. Lancet. **376**(9751): p. 1476-84.
28. *Public Health Weekly Reports for SEPTEMBER 23, 1938*. Public Health Rep, 1938. **53**(38): p. 1685-1732.

## FIGURES LEGENDS

### Figure 1. Flow chart

### Figure 2. Periodontal characteristics of vascular Ehlers-Danlos syndrome

Both gingival and oral mucosa appear very thin (A). Oral mucosa showed signs of spontaneous intramucosal bleeding as a likely consequence of increased fragility. Periodontal probing provoked excessive gingival bleeding (B). Assessment of gingival thinness was made by measuring levels of translucency on a scaled probe (C). Papyraceous aspect of the gingival tissue under periodontal probe pressure and decreased stippling (D). Comparison of gingival thinness (E) and gingival bleeding on probing (F) in patients with vEDS and healthy controls.

### Figure 3. Oral radiographic characteristics of vascular Ehlers-Danlos syndrome

An orthopantomogram of a 30 year old patient shows original dental findings (A) as premature remodelling of temporo-mandibular joints (B), decreased pulp volume, a thistle-shaped pulp chamber (C), an increased length of mandibular molar roots (D), root fusion of the second mandibular molar (E).

**Table 1. Baseline characteristics of patients with vascular Ehlers-Danlos syndrome and age and sex-matched healthy controls.**

| Variable                           | vEDS patients<br>n (%) or median<br>[Q1;Q3] | Controls<br>n (%) or median<br>[Q1;Q3] | Univariate p       |
|------------------------------------|---------------------------------------------|----------------------------------------|--------------------|
| N                                  | 17                                          | 46                                     |                    |
| Age                                | 33 [24;44]                                  | 36 [25;45]                             | ns                 |
| Male                               | 5 (29)                                      | 13 (28)                                | ns                 |
| <b>Periodontal features</b>        |                                             |                                        |                    |
| Plaque Index                       | 30 [20;54]                                  | 20 [13;60]                             | ns                 |
| Gingival Index                     | 1 [0;1]                                     | 1 [0;1]                                | ns                 |
| Probing Bleeding Index             | 2 [1;3]                                     | 1 [0;1]                                | 0.0003             |
| Thinness                           | 16 (94)                                     | 20 (43)                                | 0.0003             |
| <b>Temporo-mandibular features</b> |                                             |                                        |                    |
| TMJ group 1                        | 2 (12)                                      | 2 (4)                                  | ns                 |
| TMJ group 2                        | 12 (71)                                     | 8 (17)                                 | < 0.0001           |
| TMJ group 3                        | 10 (59)                                     | 3 (7)                                  | 3.10 <sup>-5</sup> |
| Total TMJ                          | 14 (82)                                     | 11 (24)                                | < 0.0001           |
| Pain                               | 7 (41)                                      | 3 (100)                                | ns                 |
| <b>Dental features</b>             |                                             |                                        |                    |
| Pulp shape modification            | 15 (94)                                     | 23 (50)                                | 0.0020             |
| Root fusion                        | 12 (75)                                     | 14 (30)                                | 0.0019             |
| Root fusion                        | 8 (50)                                      | 9 (20)                                 | 0.0262             |
| Exceeding root length              | 11 (69)                                     | 1 (2)                                  | 10 <sup>-7</sup>   |
| DFMT                               | 4 [2;11]                                    | 7 [2;9]                                | ns                 |

Plaque index is defined by (number of tooth with plaque/total number of tooth) x100. Gingival Index is defined by extent of gingival inflammation and staged from 0 to 3. DMF-T index [28] is defined by decayed, missing and filled teeth, and ranges from 0 to 28 according to number of diseased teeth.

Abbreviations: DMF-T: “decayed/missing/filled teeth-index”; TMJ: temporo-mandibular joint; vEDS: vascular Ehlers-Danlos syndrome.

**Table 2. Oral signs significantly associated to vascular Ehlers-Danlos syndrome after logistic regression and the deducted oral score.**

| Variable                   | Parameter Estimate | OR     | 95% CI       | p-value |
|----------------------------|--------------------|--------|--------------|---------|
| Intercept                  | -4.7               |        |              |         |
| TMJ-D group 3              | 3.4                | 29.5   | [2.2-389.6]  | 0.0101  |
| Pulp shape modification    | 2.6                | 14.0   | [1.0-193.8]  | 0.0488  |
| Increased root length      | 5.5                | 256.1  | [9.5->999.9] | 0.0009  |
| <b>Oral score</b>          |                    |        |              |         |
| A. TMJ group 3             |                    | No (0) |              | Yes (1) |
| B. Pulp shape modification |                    | No (0) |              | Yes (1) |
| C. Exceeding root length   |                    | No (0) |              | Yes (2) |

Oral score (A+B+C):

If score = 0 or 1, negative result

If score > 1, positive result

Abbreviations: CI : Confidence Interval ; TMJ-D: temporo-mandibular joint disorder ; OR : Odds ratio.

**Table 3. Type of *COL3A1* mutation, first major complication and oral score of the 17 patients with vascular Ehlers-Danlos syndrome.**

| Patient | Age (years) | Sex (M/F) | <i>COL3A1</i> mutation       |                  | First major complication | Oral score |
|---------|-------------|-----------|------------------------------|------------------|--------------------------|------------|
|         |             |           | DNA                          | Protein          |                          |            |
| 1       | 49          | F         | c.665G>A                     | p.Gly222Asp      | U                        | 4          |
| 2       | 30          | F         | c.2285G>A                    | p.Gly762Asp      | V                        | NA         |
| 3       | 23          | M         | c.575G>A                     | p.Gly192Asp      | D                        | 3          |
| 4       | 46          | F         | c.575G>A                     | p.Gly192Asp      | D                        | 2          |
| 5       | 19          | F         | c.1241G>T                    | p.Gly414Val      | V                        | 4          |
| 6       | 44          | F         | c.647G>C                     | p.Gly216Ala      | U                        | 4          |
| 7       | 33          | F         | c.1662+1 G>A                 | exon 23 skipping | D                        | 4          |
| 8       | 20          | F         | c.3364-2 A>G                 | exon 46 skipping | N                        | 3          |
| 9       | 55          | F         | c.755G>T                     | p.Gly252Val      | U                        | 4          |
| 10      | 20          | F         | c.755G>T                     | p.Gly252Val      | N                        | 3          |
| 11      | 37          | M         | c.952-106_996+45delinsGCTTAA | exon 14 skipping | V                        | 2          |
| 12      | 40          | F         | c.951+1G>A                   | exon 13 skipping | V                        | 3          |
| 13      | 24          | F         | c.1662+1 G>A                 | exon 23 skipping | V                        | 2          |
| 14      | 34          | M         | c.2150G>A                    | p.Gly717Asp      | V                        | 2          |
| 15      | 24          | F         | c.898-1G>C                   | exon 13 skipping | V                        | 2          |
| 16      | 50          | M         | c.2671G>A                    | p.Gly891Arg      | V                        | 0          |
| 17      | 29          | M         | c.1330G>A                    | p.Gly444Arg      | V                        | 1          |

The independent oral variables associated to vascular Ehlers-Danlos syndrome were integrated into an oral score and each significant variable weighted according to the significance of the statistical association.

Abbreviations: D: Digestive; DNA: deoxyribonucleic acid; F: Female; M: Male; N: None; U: Uterine; V: Vascular.

# Figure 1

1  
2  
3  
4  
5  
6  
7  
8  
9  
10  
11  
12  
13  
14  
15  
16  
17  
18  
19  
20  
21  
22  
23  
24  
25  
26  
27  
28  
29  
30  
31  
32  
33  
34  
35  
36  
37  
38  
39  
40  
41  
42  
43  
44  
45  
46  
47  
48  
49  
50  
51  
52  
53  
54  
55  
56  
57  
58





Figure 2

1  
2  
3  
4  
5  
6  
7  
8  
9  
10  
11  
12  
13  
14  
15  
16  
17  
18  
19  
20  
21  
22  
23  
24  
25  
26  
27  
28  
29  
30  
31  
32  
33  
34  
35  
36  
37  
38  
39  
40  
41  
42  
43  
44  
45  
46  
47  
48  
49  
50  
51  
52  
53  
54  
55  
56  
57  
58

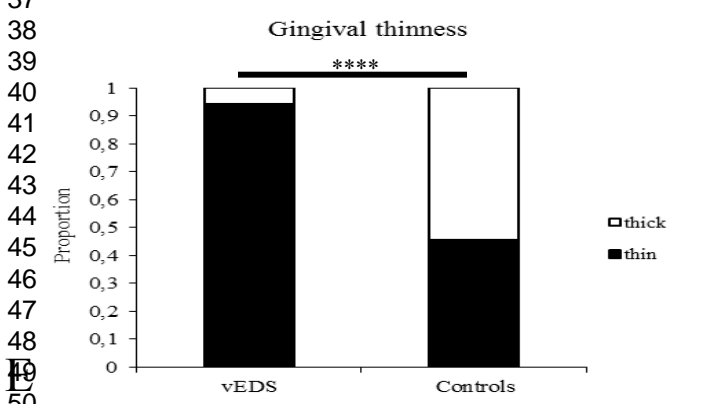

# Figure 3



1  
2  
3  
4  
5  
6  
7  
8  
9  
10  
11  
12  
13  
14  
15  
16  
17  
18  
19  
20  
21  
22  
23  
24  
25  
26  
27  
28  
29  
30  
31  
32  
33  
34  
35  
36  
37  
38  
39  
40  
41  
42  
43  
44  
45  
46  
47  
48  
49  
50  
51  
52  
53  
54  
55  
56  
57  
58

Supplemental data. A, ROC (Receiving Operating Curve) Curve of oral score.  
 B, ratio of true/false, positive/negative according to oral score

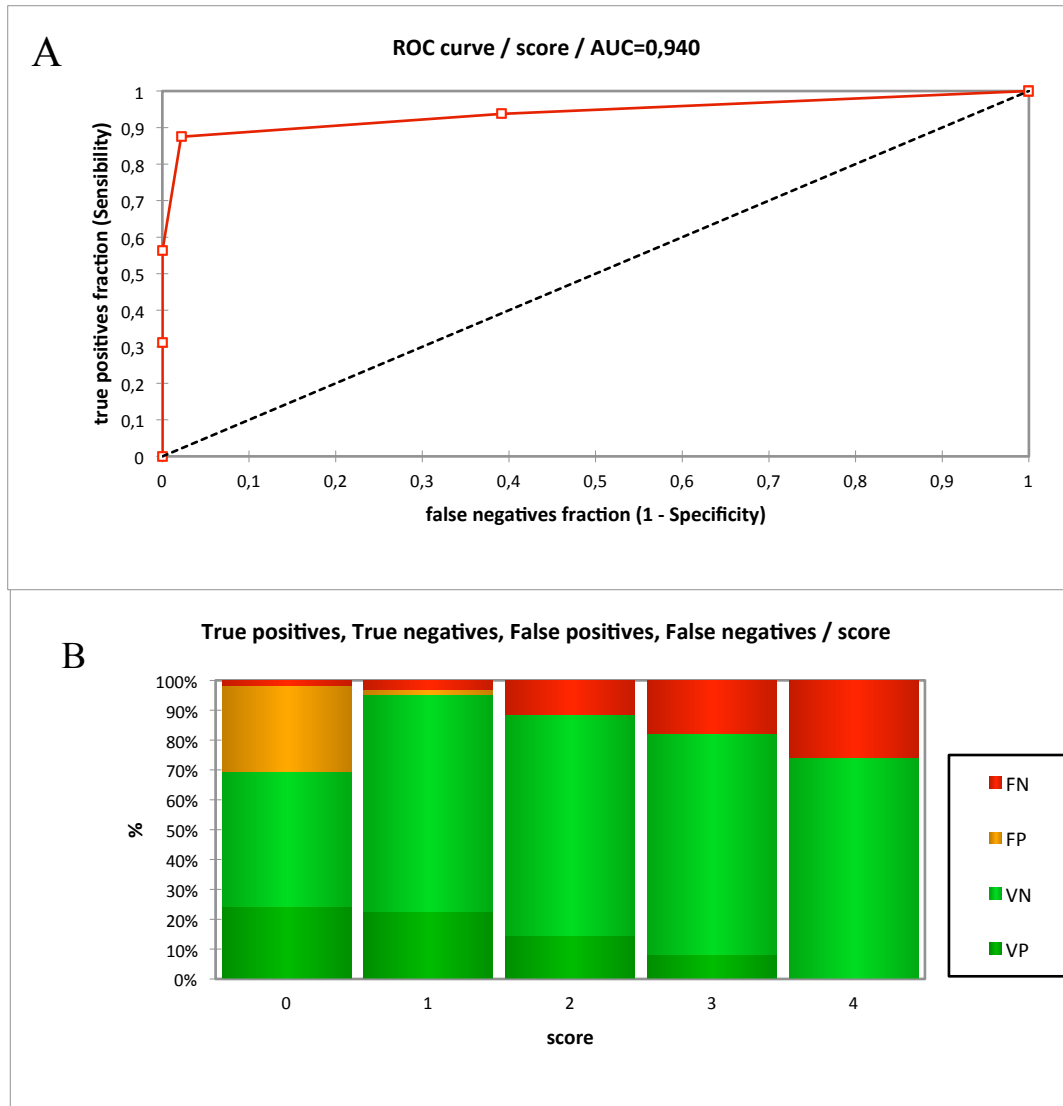



**Oral phenotype and scoring of vascular Ehlers-Danlos Syndrome: a case control study**

|                                 |                                                                                                                                                                                                                                                                                                                                                                                                                                                                                                                                                                                                                                                                                                                                                                                                                                                                                                                                                                                                                                                                                                                                                                                                    |
|---------------------------------|----------------------------------------------------------------------------------------------------------------------------------------------------------------------------------------------------------------------------------------------------------------------------------------------------------------------------------------------------------------------------------------------------------------------------------------------------------------------------------------------------------------------------------------------------------------------------------------------------------------------------------------------------------------------------------------------------------------------------------------------------------------------------------------------------------------------------------------------------------------------------------------------------------------------------------------------------------------------------------------------------------------------------------------------------------------------------------------------------------------------------------------------------------------------------------------------------|
| Journal:                        | <i>BMJ Open</i>                                                                                                                                                                                                                                                                                                                                                                                                                                                                                                                                                                                                                                                                                                                                                                                                                                                                                                                                                                                                                                                                                                                                                                                    |
| Manuscript ID:                  | bmjopen-2011-000705.R2                                                                                                                                                                                                                                                                                                                                                                                                                                                                                                                                                                                                                                                                                                                                                                                                                                                                                                                                                                                                                                                                                                                                                                             |
| Article Type:                   | Research                                                                                                                                                                                                                                                                                                                                                                                                                                                                                                                                                                                                                                                                                                                                                                                                                                                                                                                                                                                                                                                                                                                                                                                           |
| Date Submitted by the Author:   | 27-Feb-2012                                                                                                                                                                                                                                                                                                                                                                                                                                                                                                                                                                                                                                                                                                                                                                                                                                                                                                                                                                                                                                                                                                                                                                                        |
| Complete List of Authors:       | Ferré, François; Assistance publique-hôpitaux de Paris (AP-HP), Dental department, Hopital H.Mondor-A.Chenevier<br>Frank, Michael; Centre de Référence des Maladies Vasculaires Rares Gogly, Bruno; Assistance publique-hôpitaux de Paris (AP-HP), Dental department, Hopital H.Mondor-A.Chenevier<br>Golmard, Lisa; Centre de Référence des Maladies Vasculaires Rares Naveau, Adrien; Assistance publique-hôpitaux de Paris (AP-HP), Dental department, Hopital H.Mondor-A.Chenevier<br>Chérifi, Hafida; Assistance publique-hôpitaux de Paris (AP-HP), Dental department, Hopital H.Mondor-A.Chenevier<br>Emmerich, Joseph; Centre de Référence des Maladies Vasculaires Rares Gaultier, Frédéric; Assistance publique-hôpitaux de Paris (AP-HP), Dental department, Hopital H.Mondor-A.Chenevier<br>Berdal, Ariane; : Université Paris Descartes, Sorbonne Paris Cité, UMR S872, 75006 France Centre de Recherche des Cordeliers, Université Pierre et Marie Curie, UMR S872 INSERM U872, team 5<br>Jeunemaître, Xavier; Centre de Référence des Maladies Vasculaires Rares Fournier, Benjamin; Assistance publique-hôpitaux de Paris (AP-HP), Dental department, Hopital H.Mondor-A.Chenevier |
| <b>Primary Subject Heading</b>: | Dentistry and oral medicine                                                                                                                                                                                                                                                                                                                                                                                                                                                                                                                                                                                                                                                                                                                                                                                                                                                                                                                                                                                                                                                                                                                                                                        |
| Secondary Subject Heading:      | Genetics and genomics, Diagnostics                                                                                                                                                                                                                                                                                                                                                                                                                                                                                                                                                                                                                                                                                                                                                                                                                                                                                                                                                                                                                                                                                                                                                                 |
| Keywords:                       | ORAL MEDICINE, VASCULAR MEDICINE, MOLECULAR BIOLOGY                                                                                                                                                                                                                                                                                                                                                                                                                                                                                                                                                                                                                                                                                                                                                                                                                                                                                                                                                                                                                                                                                                                                                |
|                                 |                                                                                                                                                                                                                                                                                                                                                                                                                                                                                                                                                                                                                                                                                                                                                                                                                                                                                                                                                                                                                                                                                                                                                                                                    |

SCHOLARONE™  
Manuscripts

1  
2  
3 Oral phenotype and scoring of vascular Ehlers-Danlos Syndrome: a  
4  
5  
6 case control study  
7  
8  
9

10  
11 FERRE FC <sup>1,3</sup>, FRANK M <sup>2</sup>, GOGLY B <sup>1,3</sup>, GOLMARD L <sup>2</sup>, NAVEAU A <sup>1,3</sup>, CHERIFI H <sup>1,3</sup>,  
12  
13 EMMERICH J <sup>2,4</sup>, GAUTIER F <sup>1</sup>, BERDAL A <sup>3</sup>, JEUNEMAITRE X <sup>2,5</sup>, FOURNIER BPJ <sup>1,3</sup>  
14  
15

16  
17  
18 1 : A.Chenevier- H.Mondor hospital, Dental department, Créteil, France  
19 2 : Centre de Référence des Maladies Vasculaires Rares, HEGP, Paris, France  
20 3 : Université Paris Descartes, Sorbonne Paris Cité, UMR S872, 75006 France  
21 Centre de Recherche des Cordeliers, Université Pierre et Marie Curie, UMR S872  
22 INSERM U872, Paris, France  
23 4 : INSERM U765, Paris, France  
24 5 : INSERM U970, P.A.R.C.C.,Paris, France  
25  
26  
27

28  
29 **Corresponding author:** Dr Ferré François, DDS  
30 A.Chenevier/H.Mondor hospital, Dental department  
31 40 rue Mesly, 94 000 Créteil, France  
32 Mail to: ferrefrancois@hotmail.com  
33  
34  
35  
36  
37  
38  
39  
40  
41  
42  
43  
44  
45  
46  
47  
48  
49  
50  
51  
52  
53  
54  
55  
56  
57  
58  
59  
60

## Summary

### Article Focus

- To provide physicians with an in-depth description of oral involvement of patients with vascular Ehlers-Danlos syndrome.
- To evaluate specificity of gingival recession, a minor diagnostic criterion for vEDS in the Villefranche classification-

### Key Messages

- Prevalence of gingival recession and periodontitis was low among patients with vEDS.
- Conversely, patients showed marked gingival fragility, temporo-mandibular joint disorders, dentin formation defects, molar root fusion and increased root length.
- Several new specific oral signs of this disease were identified, whose combination may be of greater diagnostic value.

### Strengths and Limitations

- All screened patients had genetically confirmed vascular Ehlers-Danlos syndrome.
- Limited sample size, sex ratio imbalance, pre-adult patients were not included. Validation studies are necessary.



**ABSTRACT**

**Objective:** Vascular Ehlers-Danlos syndrome (vEDS) is a rare genetic condition related to mutations in the *COL3A1* gene, responsible of vascular, digestive and uterine accidents. Difficulty of clinical diagnosis has led to the design of diagnostic criteria, summarized in the Villefranche classification. Our goal was to assess oral features of vEDS. Gingival recession is the only oral sign recognized as a minor diagnostic criterion. We aimed to check this assumption, since bibliographical search related to gingival recession in vEDS proved scarce.

**Design:** prospective case-control study

**Setting:** Dental surgery department in a French tertiary hospital.

**Participants:** 17 consecutive patients with genetically proven vascular Ehlers-Danlos syndrome, aged 19 to 55 years were compared to 46 age and sex-matched controls.

**Observations:** Complete oral examination (clinical and radiological) with standardized assessment of periodontal structure, temporo-mandibular joint function and dental characteristics were performed. *COL3A1* mutations were identified by direct sequencing of genomic or complementary DNA.

**Results:** Prevalence of gingival recession was low among patients with vEDS, as for periodontitis. Conversely, patients showing marked gingival fragility, temporo-mandibular disorders, dentin formation defects, molar root fusion and increased root length. After logistic regression, 3 variables remained significantly associated to vEDS. These variables were integrated in a diagnostic oral score with 87.5% and 97% sensitivity and specificity respectively.

**Conclusion:** Gingival recession is an inappropriate diagnostic criterion for vEDS. Several new specific oral signs of the disease were identified, whose combination may be of greater value in diagnosing vascular Ehlers-Danlos syndrome.

1  
2  
3 **Key words (MeSH):** Ehlers-Danlos syndrome, vascular type; Oral, Diagnostic Tests, General  
4  
5 practice.  
6  
7  
8  
9  
10  
11  
12  
13  
14  
15  
16  
17  
18  
19  
20  
21  
22  
23  
24  
25  
26  
27  
28  
29  
30  
31  
32  
33  
34  
35  
36  
37  
38  
39  
40  
41  
42  
43  
44  
45  
46  
47  
48  
49  
50  
51  
52  
53  
54  
55  
56  
57  
58  
59  
60

For peer review only



## INTRODUCTION

Vascular Ehlers-Danlos syndrome (vEDS OMIM # 130050) is a rare genetic condition with an estimated prevalence of 1/150,000<sup>1</sup>. Its clinical course is the most severe amongst the Ehlers-Danlos syndromes. The inheritance of vEDS follows an autosomal dominant trait, and is related to mutations in the *COL3A1* gene, encoding the pro- $\alpha$  (1) chain of type III procollagen<sup>1</sup>. The mutation typically alters the assembly, stability and thus secretion and resistance to tensile stress of this fibrillar collagen, resulting in early spontaneous arterial, digestive and obstetrical accidents. Over 250 different mutations have been described in the *COL3A1* gene, typically either missense mutations affecting a glycine residue, splicing mutations or rare exonic deletions<sup>2</sup>. No genotype-phenotype correlations have been evidenced, except for haploinsufficiency, which may be characterized by a consistently milder phenotype<sup>3</sup>.

Oral involvement is frequently present in patients with vEDS, even in early adulthood, described as gingival recession<sup>4</sup>. This oral sign of the disease, despite being part of the minor diagnostic criteria of the Villefranche classification<sup>4</sup> remains poorly documented and no in-depth description of the proposed occurrence of gingival recession in the vEDS diagnostic criteria was found in previously published reports.

In this study, we aimed to reassess oral involvement in a cohort of patients with molecularly proven vEDS (i.e. with proven *COL3A1* mutations). We hypothesised that a systematic assessment of dental, gingival and osteo-articular characteristics of these patients would show significant differences with age- and sex-matched controls.

## METHODS

### Study design

This study was designed according to guidelines of the STROBE statement. Consecutive patients with molecularly proven vEDS and healthy volunteers were prospectively included in a monocentric case-control study. Each patient was appointed for a routine dental visit. Detailed standardized clinical records on teeth and surrounding soft tissues were made by a senior dental surgeon. Most of the time, physicians were aware of the patient's diagnostic status upon inclusion except for patients that were in diagnostic work-up with genetic testing in progress. Standardized dental X-rays were performed for each subject which included periapical X-rays of the upper and lower jaws for detection of root and surrounding bone structure, positional assessment of emerged and emerging teeth, and temporomandibular joint imaging by orthopantomogram (OPG). Intra-oral pictures were made for all patients. All examinations were performed for clinical care and diagnostic purpose.

### Study population

Patients with genetically diagnosed vEDS from the Centre de Référence des Maladies Vasculaires Rares (Hôpital Européen Georges Pompidou, Assistance Publique des Hôpitaux de Paris, Paris, France), the French national referral centre for patients with vEDS, were sent to the Dental Department of Albert Chenevier Henri-Mondor university hospital for dental care. Patients with suspected vEDS referred for dental status assessment without mutation in the *COL3A1* gene were excluded of the study after screening. The control group was constituted by random inclusion of consecutive healthy subjects that consulted the dental department for clinical care. Control subjects had no medical history, especially no suspicion of connective tissue disorder, and were referred for general dentistry purposes. Patients of the

1  
2  
3 control group were age- and sex-matched with the vEDS patients in a ratio close to 3 to 1. To  
4  
5 limit the possibility of confounders of gingival bleeding or temporo-mandibular disorders, 3  
6  
7 common oral indexes were measured at baseline: plaque index, gingival index, and  
8  
9 decayed/missing/filled teeth (DMF-T) index.  
10

### 11 12 13 **Medical and Genetical data.**

14  
15  
16 Patients included in this study were clinically assessed by senior physicians of the  
17  
18 French referral centre for rare vascular diseases (see above). Patient history and clinical  
19  
20 characteristics of vEDS were systematically assessed by a standardized observation. Number  
21  
22 and type of vascular, digestive and uterine complications were recorded. Major and minor  
23  
24 clinical diagnostic criteria were staged according to the Villefranche classification <sup>4</sup>. Genomic  
25  
26 DNA was obtained by saline extraction from whole blood leucocytes. The *COL3A1* gene was  
27  
28 then analyzed by direct sequencing as previously described <sup>5</sup>. In case of negative direct DNA  
29  
30 sequencing, patients were screened for exon skipping by fibroblast culture, RNA extraction,  
31  
32 reverse transcription and polymerase chain reaction (RT-PCR), and direct sequencing <sup>5</sup>. All  
33  
34 patients gave written informed consent. Mutations are described according to the  
35  
36 nomenclature recommended by the Human Genome Variation Society. DNA mutation  
37  
38 numbering was based on *COL3A1* human cDNA sequence (GenBank NM\_000090.3).  
39  
40  
41  
42  
43  
44  
45  
46  
47  
48  
49  
50  
51  
52  
53  
54  
55  
56  
57  
58  
59  
60

## Oral examination

**Periodontal status.** The periodontal data consisted in standardized measurement of gingival fragility, thickness, recession and surface texture. Fragility and bleeding tendency was assessed by a periodontal probe and staged according to Loe and Silness <sup>6</sup>. History of and ongoing gingival bleeding and its frequency during tooth brushing as described by patients was recorded. Gingival thickness was measured by the ability to see the graded periodontal probe through gingival tissue <sup>7</sup>. Recessions of the gingival margin in respect of the cemento-enamel junction were measured at six different sites per tooth. The gum surface texture (stippling) was assessed visually and evaluated qualitatively. Diagnosis of periodontitis was checked clinically and radiologically. Periodontal pockets were evaluated by probing and alveolar bone level was assessed by X-rays in order to detect horizontal and angular bone loss.

**Dental status.** Teeth were clinically and radiologically assessed for structural abnormalities and secondary lesions (decay, traumatic injury...), as well as root fusion and pulp volume, defined by the pulp to crown area ratio as measured on retro-alveolar X-Rays. Root length of mandibular teeth was defined as normal when stopping before the upper limit of the mandibular canal which is easily visible on the OPG, and as long when crossing it.

**Temporo-mandibular joint (TMJ) status.** History of oro-facial pain originating either from the masticatory muscles or the joint capsula was recorded, including reports of pain in the jaw, temples, face, pre-auricular area or the TMJ both at rest and in function. Physical examination included the observation and measurements of mandibular motion (maximal interincisal opening, lateral movements and protrusion), palpation of the masticatory muscles (masseter, temporalis, medial and lateral pterygoid muscles), and static and dynamic TMJ palpation. During mandibular motions, noises were staged as follows:

1  
2  
3 “clicking”, “popping” as a consequence of disk displacement, and “crunching”, “grating”  
4 and/or “grinding” as a consequence of osteoarthritis. Joint surfaces were studied on OPGs, in  
5 search of extensive flattening or sclerosis of the articular surfaces. TMJ disorders were then  
6 staged according to validated international guidelines (Research Diagnostic Criteria for  
7 Temporo-Mandibular Disorders, RDC/TMD) as previously described by Dworkin et al.<sup>8</sup>.  
8 Briefly, three groups are individualized by this classification: muscle disorders (group 1), disk  
9 displacements (group 2) and arthralgia/arthritis/arthrosis (group 3). These clinical indicators  
10 allow a stratification of TMD for each subject, for each group may be present separately or in  
11 association with one other.  
12  
13  
14  
15  
16  
17  
18  
19  
20  
21  
22  
23  
24

### 25 **Statistical analysis**

26  
27 Descriptive statistics used numbers and percentages for qualitative variables and  
28 median and inter-quartiles ranges intervals for quantitative ones. The comparison between  
29 groups was performed using chi-square tests or Fisher’s exact tests for qualitative variables  
30 and two-sample Wilcoxon tests for quantitative ones. Variables with a p-value < 0.10 in the  
31 first step were then entered in a step-wise logistic regression. Variables with a p-value < 0.06  
32 using the Wald test were retained in the final model. A simplified diagnostic score with 5  
33 levels was built from the results of the logistic model. The ROC curve of this simplified  
34 diagnostic score was computed, a threshold was determined, and sensitivity and specificity  
35 were evaluated using this threshold, with their exact 95 % confidence intervals. All the tests  
36 were two-sided, with a p-value considered significant when < 0.05. All the computations were  
37 performed using the SAS® V9.2 statistical package (SAS Institute Inc., Cary, NC, USA.)  
38  
39  
40  
41  
42  
43  
44  
45  
46  
47  
48  
49  
50  
51  
52  
53  
54  
55  
56  
57  
58  
59  
60

## RESULTS

### Participants

Between November 2009 and June 2011, 27 consecutive patients with suspected or confirmed vEDS were referred for dental examination. Patients without genetic confirmation of vEDS (n=6) were not considered eligible for participation. Of the 21 remaining patients, four declined participation and 17 were finally included (Figure 1). In one patient, OPG was unavailable and therefore excluded from the design of the oral score. Control subjects (n=68) were screened for an inclusion ratio of 3 to 1. Five subjects declined participation and 17 were considered ineligible for medical reasons (i.e pregnancy, diabetes ...), or dental status (full edentulous or severe periodontitis), leaving 46 controls that completed the study. Baseline characteristics of vEDS patients and controls are shown in table 1. Dental status of vEDS and control patients were equivalent as shown by the DMF-T index. The plaque and gingival indexes, source of confounding bias in specificity of gingival bleeding did not differ significantly between both groups.

### Periodontal status

Gingival recession was less frequent in patients (n=7; 41.2%) than in controls (n= 31; 67.3%). Periodontitis was present in 23.5% (n=4) vEDS patients only when compared to controls (n=21; 45%). Presentation of gingiva in vEDS patients was evocative of a particular periodontal phenotype rather than common dental or periodontal disease. This phenotype was characterised by a generalized thinness of both gingiva and oral mucosa, and translucency of the gingiva with apparent vasculature (Figure 2A, C). Overall, increased gingival thinness was present in 16 (94%) patients versus 20 (43.3%) controls. Gingival surface texture was also evocative, with a decreased stippling and a papyraceous aspect when pressuring the gum with the dental probe (Figure 2D). These characteristics were associated with an increase in

gingival fragility, as measured by bleeding on probing during gingival thinness assessment (Figure 2B, F, Table 1).

### **TMJ status**

Temporo-mandibular joint disorders were present in 14 (82%) patients with vEDS and in 11 (24%) controls ( $p<0.0001$ ) (Table 1). Almost half of patients (41%) described TMJ pain whereas it was reported in only 3 (6.5%) controls. Pain originated from the masticatory muscles or the temporo-mandibular joint itself (groups 1 and 3 in the TMD classification<sup>8</sup>), and were described as a discomfort during mastication or yawning. 71% of the vEDS patients presented significant intra-articular disc displacement with reduction associated to clicking (group 2). Premature remodelling of the TM articular surfaces (Figure 3B) was present in 7 out of 16 (43.8%) patients, versus 2 (4.3%) in controls ( $p=0.0086$ ). This last finding was highly prevalent in vEDS patients whereas it was uncommon in controls.

### **Dental findings**

Dental abnormalities observed in patients with vEDS were related to defects in dentin formation rather than to common dental pathology (Table 1). X-ray analysis revealed a significant reduction in pulp volume (Figure 3C) secondary to progressive pulp obliteration by dentin synthesis. Pulpar volume decreases physiologically with aging in the general population<sup>9</sup>, yet it was repeatedly observed in young vEDS patients of this cohort. Furthermore, 75% of vEDS patients presented retraction of the dental pulp shape versus 29.8% of controls (Table 1). Molar root fusion was also more frequently present, particularly in the mandibular second molar (50 %) (Figure 3D) when compared to controls (19.5%).

1  
2  
3 Mandibular dental root length was significantly increased in a large proportion of  
4  
5 vEDS patients. Increased root length was most often found on the second mandibular molar  
6  
7 (n=11/16) whereas such an observation was only exceptional in controls (n=1/46), more  
8  
9 rarely on mandibular premolars or the first molar. This sign is very easily identifiable by any  
10  
11 physician on the OPG (Figure 3E).  
12  
13

### 14 15 16 **Oral score**

17  
18 Three oral characteristics remained significantly associated to vEDS after logistic  
19  
20 regression: increased root length, modified dental pulp shape and arthralgia/arthrosis (TMJ  
21  
22 disorder group 3). These variables were staged into a diagnostic score according to results of  
23  
24 the logistic model (Table 2): increased root length was weighted 2, and the two remaining  
25  
26 variables were weighted 1. Signs were either present (scoring either 1 or 2), either not present  
27  
28 (scoring 0). The total score is the result of adding weighted values of present signs. A score of  
29  
30 0 or 1 was considered negative and a score of 2 to 4 was considered positive with a sensitivity  
31  
32 and specificity of 0.878 95%CI [0.604-0.978] and 0.978 95%CI [0.870-0.999%] respectively  
33  
34 (Table 2 and supplemental data 2).  
35  
36  
37  
38  
39  
40  
41  
42  
43  
44  
45  
46  
47  
48  
49  
50  
51  
52  
53  
54  
55  
56  
57  
58  
59  
60



## DISCUSSION

This case control study is the first specific report of oral involvement in patients with genetically confirmed patients with vascular Ehlers-Danlos syndrome. We evidenced that gingival recession may be an inappropriate diagnostic criterion of vEDS, whereas several other original findings may be of greater diagnostic value: increased dental root length, TMJ pain and premature arthrosis and a decreased pulp to crown area ratio. The first two criteria are easily identifiable by any physician on an OPG and on physical examination. The third requires either a short specific training on reading retro-alveolar X-rays, or a specific, but simple evaluation by a dental surgeon.

Oral mucosa and gingival thinness has to be considered as an aspect of the general phenotype of vEDS. Indeed, typical skin involvement is marked by increased thinness with consequent translucency<sup>10</sup> and by increased fragility, illustrated by the occurrence of extensive spontaneous haematomas and delayed papyraceous wound healing. A decreased intima-media thickness of elastic arteries in vEDS may be another phenotypic expression<sup>11</sup>. Similarly to the skin, type III collagen is present in the gingival connective tissue near the basement membrane and blood vessels<sup>10</sup>. Consequently, the disturbance of type III collagen production/secretion by the gingival fibroblast population, besides the physical and thermal stress the gum is exposed to and which may alter type III collagen<sup>12</sup>, may explain in part the increase of gingival thinness<sup>13 14</sup>, and thus its fragility and bleeding tendency. Possible involvement of type III collagen in platelet adhesion would be a further precipitating factor for bleeding<sup>15</sup>.

Dental abnormalities and particularly radicular abnormalities as increased root length that has been repeatedly evidenced in our patients may be specific of the disease, as this condition is exceptional in the general population and therefore its random finding would

1  
2  
3 have been unlikely in the vEDS group. Type III collagen is necessary to type I collagen  
4 fibrillogenesis<sup>16</sup>. Other collagen gene mutations are reported to be associated with oral and  
5 dental abnormalities: type I collagen chain gene mutations are associated with type I  
6 dentinogenesis imperfecta in the more general context of osteogenesis imperfecta<sup>17</sup>. In this  
7 case, the teeth are specifically amber and translucent. Radiographically, the teeth have short,  
8 constricted roots and dentine hypertrophy leading to pulpal obliteration<sup>17</sup>. These diverse  
9 structural defects highlight the key-role of fibrillar collagens in mineralized tissue formation.  
10 An abnormal type III collagen in dental and articular tissues may also explain the dental and  
11 TMJ abnormalities/disorders. Its presence within dentin remains controversial, yet it has been  
12 evidenced in the epithelio-mesenchymal interface during dentinogenesis<sup>18</sup>. Finally, type III  
13 collagen has been evidenced in the posterior region of disc attachments of the TMJ<sup>19</sup>.

14  
15  
16  
17  
18  
19  
20  
21  
22  
23  
24  
25  
26  
27  
28  
29  
30  
31  
32  
33  
34  
35  
36  
37  
38  
39  
40  
41  
42  
43  
44  
45  
46  
47  
48  
49  
50  
51  
52  
53  
54  
55  
56  
57  
58  
59  
60  
Previous studies have reported diverse oral signs in EDS patients but none were  
specific to vEDS and none was dedicated to a cohort of patients with molecularly confirmed  
vEDS<sup>20</sup>. The absence of genetic certainty is a major selection bias as the disease may be  
confused with other connective tissue diseases as non vascular Ehlers-Danlos syndromes or  
more recently evidenced Loeys-Dietz syndrome<sup>10</sup>. Periodontal or oral lesions were recorded  
in several studies on patients with various non vascular subtypes of Ehlers-Danlos syndrome  
patients, but no significant association between oral signs and EDS subtype could be  
evidenced<sup>21-25</sup>. The only study reporting oral signs as a possible diagnostic tool in Ehlers-  
Danlos syndromes was related to the classical (OMIM#130020) and hypermobile  
(OMIM#130000 and OMIM#130010) types<sup>26</sup>. It was suggested that absence of the inferior  
lingual and labial frenulas were specific and sensitive signs for these forms of EDS, yet these  
results have been subject to controversy<sup>27</sup>. In our population sample, frenulas were absent in  
approximately one third of patients.

1  
2  
3 This study has several limitations. Firstly, our analysis is based on a small number of  
4 patients. However, this limited population sample has to be considered in respect of the rarity  
5 of vEDS, as it is to our best knowledge the most important clinical study of oral involvement  
6 of the disease. Secondly, the sex ratio is unbalanced which may induce selection bias, notably  
7 for gingival thinness that is more common in women in the general population <sup>7</sup>. However,  
8 there is no evidence that oral signs of vEDS identified by logistic regression may be  
9 influenced by sex ratio. Furthermore patients were assigned age and sex-matched controls that  
10 may further limit any residual bias. Finally, no children or teenagers were included into this  
11 study. It is therefore not known if these findings may apply to this specific age category,  
12 which is of importance as typically the late teenage years match with the onset of digestive  
13 and arterial accidents in vEDS.  
14  
15  
16  
17  
18  
19  
20  
21  
22  
23  
24  
25  
26

27 The oral score we were able to design may be of interest for clinical diagnosis of  
28 vEDS, especially as the phenotype is usually discrete and as diagnosis may be difficult even  
29 for experienced physicians.  
30  
31  
32  
33

34 Given its high specificity and sensitivity if it were to be confirmed, its diagnostic value  
35 as a minor diagnostic criterion as defined by the Villefranche classification should be  
36 evaluated. A positive oral score associated with one major vEDS sign may indicate genetic  
37 testing of the *COL3A1* gene with a good positive predictive value. Further larger studies are  
38 necessary to determine the exact diagnostic value of gingival thinness and bleeding tendency  
39 in vEDS, as these signs were present in most patients, yet not independent predictors in our  
40 analysis.  
41  
42  
43  
44  
45  
46  
47  
48

49 In conclusion, our findings suggest that gingival retraction, used in the Villefranche  
50 classification, may be an inappropriate diagnostic criterion for vascular Ehlers-Danlos  
51 syndrome, and that increased root length, modified dental pulp shape and premature wear of  
52  
53  
54  
55  
56  
57  
58  
59  
60

1  
2  
3 TMJ are significantly associated to vEDS. These findings, if confirmed, may implement the  
4  
5 latter in a diagnostic oral score for vEDS.  
6  
7  
8

9  
10 **Author's contribution**

11 F.F., F.M., G.B., B.F. conceived and planned the study. F.M., E.J. and J.X. recruited the  
12 vEDS patients, F.F., G.B. and B.F. made the dental observations for all subjects, G.L.  
13 performed the statistical analysis; F.F., F.M., B.F., G.F., B.A., L.G., N.A. and C.H. critically  
14 reviewed and interpreted the data and results; F.F., F.M., B.F. wrote the manuscript. All  
15 authors approved the final version.  
16

17  
18 **Funding statement**

19 This research received no specific grant from any funding agency in the public, commercial or  
20 not-for-profit sectors.  
21

22  
23 **Competing interest**

24 All authors declare to have no competing interest.  
25  
26  
27  
28  
29  
30  
31  
32  
33  
34  
35  
36  
37  
38  
39  
40  
41  
42  
43  
44  
45  
46  
47  
48  
49  
50  
51  
52  
53  
54  
55  
56  
57  
58  
59  
60

## REFERENCES

1. Pepin M, Schwarze U, Superti-Furga A, et al. Clinical and genetic features of Ehlers-Danlos syndrome type IV, the vascular type. *N Engl J Med* 2000;342(10):673-80.
2. Germain DP. Clinical and genetic features of vascular Ehlers-Danlos syndrome. *Ann Vasc Surg* 2002;16(3):391-7.
3. Leistriz DF, Pepin MG, Schwarze U, et al. COL3A1 haploinsufficiency results in a variety of Ehlers-Danlos syndrome type IV with delayed onset of complications and longer life expectancy. *Genet Med* 2011;13(8):717-22.
4. Beighton P, De Paepe A, Steinmann B, et al. Ehlers-Danlos syndromes: revised nosology, Villefranche, 1997. Ehlers-Danlos National Foundation (USA) and Ehlers-Danlos Support Group (UK). *Am J Med Genet* 1998;77(1):31-7.
5. Pepin MG, Byers PH. *Ehlers-Danlos Syndrome Type IV*. 1993-. 1999 Sep 02 ed, 1993.
6. Loe H. The Gingival Index, the Plaque Index and the Retention Index Systems. *J Periodontol* 1967;38(6):Suppl:610-6.
7. De Rouck T, Eghbali R, Collys K, et al. The gingival biotype revisited: transparency of the periodontal probe through the gingival margin as a method to discriminate thin from thick gingiva. *J Clin Periodontol* 2009;36(5):428-33.
8. Dworkin SF, LeResche L. Research diagnostic criteria for temporomandibular disorders: review, criteria, examinations and specifications, critique. *J Craniomandib Disord* 1992;6(4):301-55.
9. Morse DR. Age-related changes of the dental pulp complex and their relationship to systemic aging. *Oral Surg Oral Med Oral Pathol* 1991;72(6):721-45.
10. Germain DP. Ehlers-Danlos syndrome type IV. *Orphanet J Rare Dis* 2007;2:32.
11. Boutouyrie P, Germain DP, Fiessinger JN, et al. Increased carotid wall stress in vascular Ehlers-Danlos syndrome. *Circulation* 2004;109(12):1530-5.
12. Anderson DW, Thakker-Varia S, Tromp G, et al. A glycine (415)-to-serine substitution results in impaired secretion and decreased thermal stability of type III procollagen in a patient with Ehlers-Danlos syndrome type IV. *Hum Mutat* 1997;9(1):62-3.
13. Byers PH, Holbrook KA, Barsh GS, et al. Altered secretion of type III procollagen in a form of type IV Ehlers-Danlos syndrome. Biochemical studies in cultured fibroblasts. *Lab Invest* 1981;44(4):336-41.
14. Smith LT, Schwarze U, Goldstein J, et al. Mutations in the COL3A1 gene result in the Ehlers-Danlos syndrome type IV and alterations in the size and distribution of the major collagen fibrils of the dermis. *J Invest Dermatol* 1997;108(3):241-7.
15. Massberg S, Gawaz M, Gruner S, et al. A crucial role of glycoprotein VI for platelet recruitment to the injured arterial wall in vivo. *J Exp Med* 2003;197(1):41-9.
16. Liu X, Wu H, Byrne M, et al. Type III collagen is crucial for collagen I fibrillogenesis and for normal cardiovascular development. *Proc Natl Acad Sci U S A* 1997;94(5):1852-6.
17. Barron MJ, McDonnell ST, Mackie I, et al. Hereditary dentine disorders: dentinogenesis imperfecta and dentine dysplasia. *Orphanet J Rare Dis* 2008;3:31.
18. Bronckers AL, Lyaruu DM, Woltgens JH. Immunohistochemistry of extracellular matrix proteins during various stages of dentinogenesis. *Connect Tissue Res* 1989;22(1-4):65-70.
19. Gage JP, Viridi AS, Triffitt JT, et al. Presence of type III collagen in disc attachments of human temporomandibular joints. *Arch Oral Biol* 1990;35(4):283-8.
20. De Coster PJ, Martens LC, De Paepe A. Oral health in prevalent types of Ehlers-Danlos syndromes. *J Oral Pathol Med* 2005;34(5):298-307.

- 1
- 2
- 3 21. Linch DC, Acton CH. Ehlers-Danlos syndrome presenting with juvenile destructive
- 4 periodontitis. *Br Dent J* 1979;147(4):95-6.
- 5 22. Ooshima T, Abe K, Kohno H, et al. Oral manifestations of Ehlers-Danlos syndrome type
- 6 VII: histological examination of a primary tooth. *Pediatr Dent* 1990;12(2):102-6.
- 7 23. Pope FM, Komorowska A, Lee KW, et al. Ehlers Danlos syndrome type I with novel
- 8 dental features. *J Oral Pathol Med* 1992;21(9):418-21.
- 9 24. Karrer S, Landthaler M, Schmalz G. Ehlers-Danlos type VIII. Review of the literature.
- 10 *Clin Oral Investig* 2000;4(2):66-9.
- 11 25. Rahman N, Dunstan M, Teare MD, et al. Ehlers-Danlos syndrome with severe early-onset
- 12 periodontal disease (EDS-VIII) is a distinct, heterogeneous disorder with one
- 13 predisposition gene at chromosome 12p13. *Am J Hum Genet* 2003;73(1):198-204.
- 14 26. De Felice C, Toti P, Di Maggio G, et al. Absence of the inferior labial and lingual frenula
- 15 in Ehlers-Danlos syndrome. *Lancet* 2001;357(9267):1500-2.
- 16 27. Shankar S, Shirley E, Burrows NP. Absence of inferior labial or lingual frenula is not a
- 17 useful clinical marker for Ehlers-Danlos syndrome in the UK. *J Eur Acad Dermatol*
- 18 *Venereol* 2006;20(10):1383-4.
- 19 28. Public Health Weekly Reports for SEPTEMBER 23, 1938. *Public Health Rep*
- 20 1938;53(38):1685-732.
- 21
- 22
- 23
- 24
- 25
- 26
- 27
- 28
- 29
- 30
- 31
- 32
- 33
- 34
- 35
- 36
- 37
- 38
- 39
- 40
- 41
- 42
- 43
- 44
- 45
- 46
- 47
- 48
- 49
- 50
- 51
- 52
- 53
- 54
- 55
- 56

## 57 FIGURES LEGENDS

- 58
- 59
- 60

1  
2  
3  
4  
5 **Figure 1. Flow chart**  
6  
7  
8

9 **Figure 2. Periodontal characteristics of vascular Ehlers-Danlos syndrome**

10 Both gingival and oral mucosa appear very thin (A). Oral mucosa showed signs of  
11 spontaneous intramucosal bleeding as a likely consequence of increased fragility. Periodontal  
12 probing provoked excessive gingival bleeding (B). Assessment of gingival thinness was made  
13 by measuring levels of translucency on a scaled probe (C). Papyraceous aspect of the gingival  
14 tissue under periodontal probe pressure and decreased stippling (D). Comparison of gingival  
15 thinness (E) and gingival bleeding on probing (F) in patients with vEDS and healthy controls.  
16  
17  
18  
19  
20  
21  
22  
23  
24  
25  
26

27 **Figure 3. Oral radiographic characteristics of vascular Ehlers-Danlos syndrome**

28 An orthopantomogram of a 30 year old patient shows original dental findings (A) as premature  
29 remodelling of temporo-mandibular joints (B), decreased pulp volume, a thistle-shaped pulp  
30 chamber (C), an increased length of mandibular molar roots (D), root fusion of the second  
31 mandibular molar (E).  
32  
33  
34  
35  
36  
37  
38  
39  
40  
41  
42  
43  
44  
45  
46  
47  
48  
49  
50  
51  
52  
53  
54  
55  
56  
57  
58  
59  
60

**Table 1. Baseline characteristics of patients with vascular Ehlers-Danlos syndrome and age and sex-matched healthy controls.**

| Variable                           | vEDS patients<br>n (%) or median<br>[Q1;Q3] | Controls<br>n (%) or median<br>[Q1;Q3] | Univariate p       |
|------------------------------------|---------------------------------------------|----------------------------------------|--------------------|
| N                                  | 17                                          | 46                                     |                    |
| Age                                | 33 [24;44]                                  | 36 [25;45]                             | ns                 |
| Male                               | 5 (29)                                      | 13 (28)                                | ns                 |
| <b>Periodontal features</b>        |                                             |                                        |                    |
| Plaque Index                       | 30 [20;54]                                  | 20 [13;60]                             | ns                 |
| Gingival Index                     | 1 [0;1]                                     | 1 [0;1]                                | ns                 |
| Probing Bleeding Index             | 2 [1;3]                                     | 1 [0;1]                                | 0.0003             |
| Thinness                           | 16 (94)                                     | 20 (43)                                | 0.0003             |
| <b>Temporo-mandibular features</b> |                                             |                                        |                    |
| TMJ group 1                        | 2 (12)                                      | 2 (4)                                  | ns                 |
| TMJ group 2                        | 12 (71)                                     | 8 (17)                                 | < 0.0001           |
| TMJ group 3                        | 10 (59)                                     | 3 (7)                                  | 3.10 <sup>-5</sup> |
| Total TMJ                          | 14 (82)                                     | 11 (24)                                | < 0.0001           |
| Pain                               | 7 (41)                                      | 3 (100)                                | ns                 |
| <b>Dental features</b>             |                                             |                                        |                    |
| Pulp shape modification            | 15 (94)                                     | 23 (50)                                | 0.0020             |
| Root fusion                        | 12 (75)                                     | 14 (30)                                | 0.0019             |
| Root fusion                        | 8 (50)                                      | 9 (20)                                 | 0.0262             |
| Exceeding root length              | 11 (69)                                     | 1 (2)                                  | 10 <sup>-7</sup>   |
| DFMT                               | 4 [2;11]                                    | 7 [2;9]                                | ns                 |

Plaque index is defined by (number of tooth with plaque/total number of tooth) x100. Gingival Index is defined by extent of gingival inflammation and staged from 0 to 3. DMF-T index<sup>28</sup> is defined by decayed, missing and filled teeth, and ranges from 0 to 28 according to number of diseased teeth.

Abbreviations: DMF-T: “decayed/missing/filled teeth-index”; TMJ: temporo-mandibular joint; vEDS: vascular Ehlers-Danlos syndrome.



**Table 2. Oral signs significantly associated to vascular Ehlers-Danlos syndrome after logistic regression and the deducted oral score.**

| Variable                   | Parameter Estimate | OR     | 95% CI       | p-value |
|----------------------------|--------------------|--------|--------------|---------|
| Intercept                  | -4.7               |        |              |         |
| TMJ-D group 3              | 3.4                | 29.5   | [2.2-389.6]  | 0.0101  |
| Pulp shape modification    | 2.6                | 14.0   | [1.0-193.8]  | 0.0488  |
| Increased root length      | 5.5                | 256.1  | [9.5->999.9] | 0.0009  |
| <b>Oral score</b>          |                    |        |              |         |
| A. TMJ group 3             |                    | No (0) |              | Yes (1) |
| B. Pulp shape modification |                    | No (0) |              | Yes (1) |
| C. Exceeding root length   |                    | No (0) |              | Yes (2) |

Oral score (A+B+C):

If score = 0 or 1, negative result

If score > 1, positive result

Abbreviations: CI : Confidence Interval ; TMJ-D: temporo-mandibular joint disorder ; OR : Odds ratio.

**Table 3. Type of *COL3A1* mutation, first major complication and oral score of the 17 patients with vascular Ehlers-Danlos syndrome.**

| Patient | Age (years) | Sex (M/F) | <i>COL3A1</i> mutation       |                  | First major complication | Oral score |
|---------|-------------|-----------|------------------------------|------------------|--------------------------|------------|
|         |             |           | DNA                          | Protein          |                          |            |
| 1       | 49          | F         | c.665G>A                     | p.Gly222Asp      | U                        | 4          |
| 2       | 30          | F         | c.2285G>A                    | p.Gly762Asp      | V                        | NA         |
| 3       | 23          | M         | c.575G>A                     | p.Gly192Asp      | D                        | 3          |
| 4       | 46          | F         | c.575G>A                     | p.Gly192Asp      | D                        | 2          |
| 5       | 19          | F         | c.1241G>T                    | p.Gly414Val      | V                        | 4          |
| 6       | 44          | F         | c.647G>C                     | p.Gly216Ala      | U                        | 4          |
| 7       | 33          | F         | c.1662+1 G>A                 | exon 23 skipping | D                        | 4          |
| 8       | 20          | F         | c.3364-2 A>G                 | exon 46 skipping | N                        | 3          |
| 9       | 55          | F         | c.755G>T                     | p.Gly252Val      | U                        | 4          |
| 10      | 20          | F         | c.755G>T                     | p.Gly252Val      | N                        | 3          |
| 11      | 37          | M         | c.952-106_996+45delinsGCTTAA | exon 14 skipping | V                        | 2          |
| 12      | 40          | F         | c.951+1G>A                   | exon 13 skipping | V                        | 3          |
| 13      | 24          | F         | c.1662+1 G>A                 | exon 23 skipping | V                        | 2          |
| 14      | 34          | M         | c.2150G>A                    | p.Gly717Asp      | V                        | 2          |
| 15      | 24          | F         | c.898-1G>C                   | exon 13 skipping | V                        | 2          |
| 16      | 50          | M         | c.2671G>A                    | p.Gly891Arg      | V                        | 0          |
| 17      | 29          | M         | c.1330G>A                    | p.Gly444Arg      | V                        | 1          |

The independent oral variables associated to vascular Ehlers-Danlos syndrome were integrated into an oral score and each significant variable weighted according to the significance of the statistical association.

Abbreviations: D: Digestive; DNA: desoxyribonucleic acid; F: Female; M: Male; N: None; U: Uterine; V: Vascular.

# Figure 1

1  
2  
3  
4  
5  
6  
7  
8  
9  
10  
11  
12  
13  
14  
15  
16  
17  
18  
19  
20  
21  
22  
23  
24  
25  
26  
27  
28  
29  
30  
31  
32  
33  
34  
35  
36  
37  
38  
39  
40  
41  
42  
43  
44  
45  
46  
47  
48  
49  
50  
51  
52  
53  
54  
55  
56  
57  
58



Figure 2

1  
2  
3  
4  
5  
6  
7  
8  
9  
10  
11  
12  
13  
14  
15  
16  
17  
18  
19  
20  
21  
22  
23  
24  
25  
26  
27  
28  
29  
30  
31  
32  
33  
34  
35  
36  
37  
38  
39  
40  
41  
42  
43  
44  
45  
46  
47  
48  
49  
50  
51  
52  
53  
54  
55  
56  
57  
58



Figure 3



1  
2  
3  
4  
5  
6  
7  
8  
9  
10  
11  
12  
13  
14  
15  
16  
17  
18  
19  
20  
21  
22  
23  
24  
25  
26  
27  
28  
29  
30  
31  
32  
33  
34  
35  
36  
37  
38  
39  
40  
41  
42  
43  
44  
45  
46  
47  
48  
49  
50  
51  
52  
53  
54  
55  
56  
57  
58

Supplemental data. A, ROC (Receiving Operating Curve) Curve of oral score.  
 B, ratio of true/false, positive/negative according to oral score



Supplement: bmjopen-2011-000705.draft_revisions.pdf [file bmjopen-2011-000705.draft_revisions.pdf]
