# Supplementary material for: Oral phenotype and scoring of vascular Ehlers–Danlos syndrome: a case–control study
Source: PubMed Central journal article supplement — BMJ Open. 2012 Apr 5;2(2):e000705. doi: 10.1136/bmjopen-2011-000705 (PMC3323826; doi:10.1136/bmjopen-2011-000705), 2012-04-05

Supplemental data. A, ROC (Receiving Operating Curve) Curve of oral score.  
B, ratio of true/false, positive/negative according to oral score

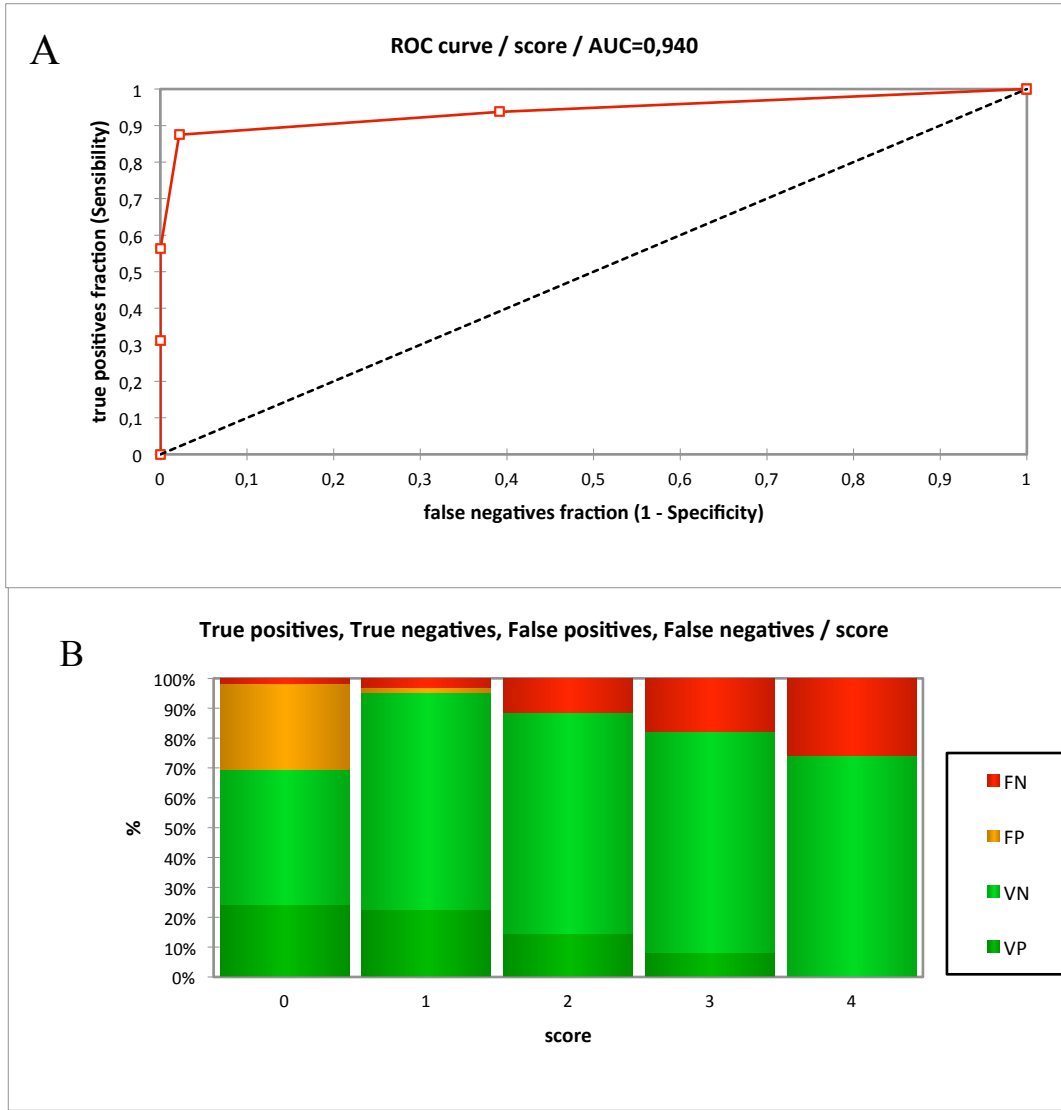

Supplement: bmjopen-2011-000705-s1.pdf [file bmjopen-2011-000705-s1.pdf]
