# Supplementary material for: Oral phenotype and scoring of vascular Ehlers–Danlos syndrome: a case–control study
Source: PubMed Central journal article supplement — BMJ Open. 2012 Apr 5;2(2):e000705. doi: 10.1136/bmjopen-2011-000705 (PMC3323826; doi:10.1136/bmjopen-2011-000705), 2012-04-05
Supplement: bmjopen-2011-000705-s2.pdf [file bmjopen-2011-000705-s2.pdf]

STROBE Statement—Checklist of items that should be included in reports of *case-control studies*

|                              | Item No | Recommendation                                                                                                                                                                                                                                        |
|------------------------------|---------|-------------------------------------------------------------------------------------------------------------------------------------------------------------------------------------------------------------------------------------------------------|
| Title and abstract           | 1       | (a) Indicate the study’s design with a commonly used term in the title or the abstract <b>P.1-2</b>                                                                                                                                                   |
|                              |         | (b) Provide in the abstract an informative and balanced summary of what was done and what was found <b>P.2</b>                                                                                                                                        |
| <b>Introduction</b>          |         |                                                                                                                                                                                                                                                       |
| Background/rationale         | 2       | Explain the scientific background and rationale for the investigation being reported <b>P.3 § 1,2</b>                                                                                                                                                 |
| Objectives                   | 3       | State specific objectives, including any prespecified hypotheses <b>P. 3§3</b>                                                                                                                                                                        |
| <b>Methods</b>               |         |                                                                                                                                                                                                                                                       |
| Study design                 | 4       | Present key elements of study design early in the paper <b>P. 4§1</b>                                                                                                                                                                                 |
| Setting                      | 5       | Describe the setting, locations, and relevant dates, including periods of recruitment, exposure, follow-up, and data collection <b>P.4§2</b>                                                                                                          |
| Participants                 | 6       | (a) Give the eligibility criteria, and the sources and methods of case ascertainment and control selection. Give the rationale for the choice of cases and controls <b>P.4§2, P.5</b>                                                                 |
|                              |         | (b) For matched studies, give matching criteria and the number of controls per case <b>P.4§2</b>                                                                                                                                                      |
| Variables                    | 7       | Clearly define all outcomes, exposures, predictors, potential confounders, and effect modifiers. Give diagnostic criteria, if applicable <b>P. 4-7</b>                                                                                                |
| Data sources/<br>measurement | 8*      | For each variable of interest, give sources of data and details of methods of assessment (measurement). Describe comparability of assessment methods if there is more than one group <b>P.5§2 +P.6 +P.7§1 (patients) P.5§2 +P.6 +P.7§1 (controls)</b> |
| Bias                         | 9       | Describe any efforts to address potential sources of bias <b>P.4§2+ P.5§2</b>                                                                                                                                                                         |
| Study size                   | 10      | Explain how the study size was arrived at <b>N.A</b>                                                                                                                                                                                                  |
| Quantitative variables       | 11      | Explain how quantitative variables were handled in the analyses <b>P.7§2</b> . If applicable, describe which groupings were chosen and why <b>N.A</b>                                                                                                 |
| Statistical methods          | 12      | (a) Describe all statistical methods, including those used to control for confounding <b>P.7§2</b>                                                                                                                                                    |
|                              |         | (b) Describe any methods used to examine subgroups and interactions <b>N.A</b>                                                                                                                                                                        |
|                              |         | (c) Explain how missing data were addressed <b>P.8§1</b>                                                                                                                                                                                              |
|                              |         | (d) If applicable, explain how matching of cases and controls was addressed <b>P.6§1</b>                                                                                                                                                              |
|                              |         | (e) Describe any sensitivity analyses <b>P.7§2+supplemental data, analysis statistic</b>                                                                                                                                                              |
| <b>Results</b>               |         |                                                                                                                                                                                                                                                       |
| Participants                 | 13*     | (a) Report numbers of individuals at each stage of study—eg numbers potentially eligible, examined for eligibility, confirmed eligible, included in the study, completing follow-up, and analysed <b>Figure 1+P. 8§1</b>                              |
|                              |         | (b) Give reasons for non-participation at each stage <b>Figure 1 P. 8§1</b>                                                                                                                                                                           |
|                              |         | (c) Consider use of a flow diagram <b>Figure 1</b>                                                                                                                                                                                                    |
| Descriptive data             | 14*     | (a) Give characteristics of study participants (eg demographic, clinical, social) and information on exposures and potential confounders <b>Table 1. P. 8§1</b>                                                                                       |
|                              |         | (b) Indicate number of participants with missing data for each variable of interest <b>P. 8§1</b>                                                                                                                                                     |

|                          |     |                                                                                                                                                                                                                                                                                                                                                                                                                                                                                                                           |
|--------------------------|-----|---------------------------------------------------------------------------------------------------------------------------------------------------------------------------------------------------------------------------------------------------------------------------------------------------------------------------------------------------------------------------------------------------------------------------------------------------------------------------------------------------------------------------|
| Outcome data             | 15* | Report numbers in each exposure category, or summary measures of exposure <b>N.A</b>                                                                                                                                                                                                                                                                                                                                                                                                                                      |
| Main results             | 16  | <p>(a) Give unadjusted estimates and, if applicable, confounder-adjusted estimates and their precision (eg, 95% confidence interval). Make clear which confounders were adjusted for and why they were included <b>Table 1, 2, 3,4 and supplemental data, statistical analysis</b></p> <p>(b) Report category boundaries when continuous variables were categorized <b>Table 1</b></p> <p>(c) If relevant, consider translating estimates of relative risk into absolute risk for a meaningful time period <b>N.A</b></p> |
| Other analyses           | 17  | Report other analyses done—eg analyses of subgroups and interactions, and sensitivity analyses <b>Table 2, supplemental data statistical analysis</b>                                                                                                                                                                                                                                                                                                                                                                     |
| <b>Discussion</b>        |     |                                                                                                                                                                                                                                                                                                                                                                                                                                                                                                                           |
| Key results              | 18  | Summarise key results with reference to study objectives <b>P.10§3</b>                                                                                                                                                                                                                                                                                                                                                                                                                                                    |
| Limitations              | 19  | Discuss limitations of the study, taking into account sources of potential bias or imprecision. Discuss both direction and magnitude of any potential bias <b>P.12§3- P.13§1</b>                                                                                                                                                                                                                                                                                                                                          |
| Interpretation           | 20  | Give a cautious overall interpretation of results considering objectives, limitations, multiplicity of analyses, results from similar studies, and other relevant evidence <b>P.11,12</b>                                                                                                                                                                                                                                                                                                                                 |
| Generalisability         | 21  | Discuss the generalisability (external validity) of the study results <b>P.13</b>                                                                                                                                                                                                                                                                                                                                                                                                                                         |
| <b>Other information</b> |     |                                                                                                                                                                                                                                                                                                                                                                                                                                                                                                                           |
| Funding                  | 22  | Give the source of funding and the role of the funders for the present study and, if applicable, for the original study on which the present article is based <b>N.A</b>                                                                                                                                                                                                                                                                                                                                                  |
